1         **Diet, psychosocial stress, and Alzheimer’s disease-related neuroanatomy in female**  
2                                 **nonhuman primates**

3     Brett M. Frye<sup>1</sup>, Suzanne Craft<sup>2</sup>, Thomas C. Register <sup>1</sup>, Rachel N. Andrews<sup>1</sup>, Susan E. Appt<sup>1</sup>,  
4     Mara Z. Vitolins<sup>3</sup>, Beth Uberseder<sup>1</sup>, Marnie G. Silverstein-Metzler<sup>1</sup>, Haiying Chen<sup>4</sup>, Christopher  
5     T. Whitlow<sup>5</sup>, Jeongchul Kim<sup>5</sup>, Richard A. Barcus<sup>5</sup>, Samuel N. Lockhart<sup>2</sup>, Siobhan Hoscheidt<sup>6</sup>,  
6     Brandon M. Say<sup>7</sup>, Sarah E. Corbitt<sup>8</sup>, Carol A. Shively<sup>1</sup>

7  
8

9     <sup>1</sup> Department of Pathology/Comparative Medicine, Wake Forest School of Medicine

10    <sup>2</sup> Wake Forest Alzheimer’s Disease Research Center

11    <sup>3</sup> Department of Epidemiology & Prevention, Wake Forest School of Medicine

12    <sup>4</sup> Department of Biostatistics and Data Science, Wake Forest School of Medicine

13    <sup>5</sup> Department of Radiology, Wake Forest School of Medicine

14    <sup>6</sup> Department of Psychology, University of Arizona

15    <sup>7</sup> Department of Pathology, Stanford University School of Medicine

16    <sup>8</sup> Biomedical Sciences, MS program | Integrative Physiology and Pharmacology

17    Adult Behavioral Health

18  
19

20    Corresponding Author:         Carol A. Shively, PhD  
21                                     Department of Pathology/Comparative Medicine  
22                                     Wake Forest School of Medicine  
23                                     Medical Center Blvd  
24                                     Winston-Salem, NC 27157-1040  
25                                     Tel. 3366161524; fax 3367161515  
26                                     **[cshively@wakehealth.edu](mailto:cshively@wakehealth.edu)**

27 **HIGHLIGHTS**

- 28 • Global brain volumes changed in response to Western, but not Mediterranean, diet.
- 29 • Western diet increased cortical thickness in multiple regions relevant to AD.
- 30 • Mediterranean diet did not alter cortical thicknesses relevant to AD.
- 31 • Brain regions associated with AD risk differed between low and high stress monkeys.
- 32 • Psychosocial stress may modulate the effects of diet on the brain.

33

34

35 **ABSTRACT**

36 **INTRODUCTION:** Associations between diet, psychosocial stress, and neurodegenerative  
37 disease, including Alzheimer’s disease (AD), have been reported, but causal relationships are  
38 difficult to determine in human studies.

39 **METHODS:** We used structural magnetic resonance imaging in a well-validated nonhuman  
40 primate model of AD-like neuropathology to examine the longitudinal effects of diet  
41 (Mediterranean versus Western) and social subordination stress on brain anatomy, including  
42 global volumes, cortical thicknesses and volumes, and twenty individual regions of interest  
43 (ROIs).

44 **RESULTS:** Western diet resulted in greater cortical thicknesses, total brain volumes and gray  
45 matter, and diminished cerebrospinal fluid and white matter volumes. Socially stressed  
46 subordinates had smaller whole brain volumes but larger ROIs relevant to AD than dominants.

47 **DISCUSSION:** The observation of increased size of AD-related brain areas is consistent with  
48 similar reports of mid-life volume increases predicting increased AD risk later in life. While the  
49 biological mechanisms underlying the findings require future investigation, these observations  
50 suggest that Western diet and psychosocial stress instigate pathologic changes that increase  
51 risk of AD-associated neuropathologies, whereas Mediterranean diet may protect the brain.

52

53

54 **KEYWORDS**

55 Nonhuman primate, magnetic resonance imaging, Alzheimer's disease, diet, psychological  
56 stress

57

58

59 **RESEARCH IN CONTEXT**

60 1. Systematic review: The authors reviewed the literature with PubMed and Google Scholar  
61 and found a number of publications which are cited that suggest that AD pathogenesis  
62 begins well before the onset of symptoms.

63 2. Interpretation: Our findings support the hypothesis that Western diet and psychosocial  
64 stress may instigate neuroinflammatory responses that increase risk of later developing AD-  
65 like neuropathologies, whereas the structural stasis in the Mediterranean diet group may  
66 represent a resilient phenotype.

67 3. Future directions: The manuscript serves as a critical first step in describing risk and resilient  
68 phenotypes during middle age in a nonhuman primate model of AD-like neuropathology.  
69 This report lays the groundwork for ongoing efforts to determine whether neuroinflammatory  
70 profiles differed across diet and stress groups. Future studies should aim to understand the  
71 temporal emergence of functional disparities associated with the changes in brain structure  
72 observed here.

73

## 74 1. INTRODUCTION

75 Diet composition may be an important factor mediating risk of neurodegenerative disease [1].  
76 Routine consumption of a Western diet – high in saturated animal fats, simple sugars, and  
77 sodium – increases risk of obesity, diabetes, and autoimmune and cardiovascular diseases [2-  
78 4], all of which increase AD risk [5]. In observational studies, Western diet consumption is  
79 associated with neuroanatomical changes, e.g., reductions in hippocampal volume, that are  
80 associated with diminished cognitive performance [6]. In contrast, Mediterranean diet  
81 consumption is associated with healthy aging outcomes [7]. Adherence to Mediterranean-type  
82 diets reduces circulating biomarkers of ischemic heart disease risk [17] and is associated with  
83 decreased risk of cardiovascular disease [4], cognitive impairment [8], and AD [9]. While  
84 plausible biological mechanisms of these effects have been identified [10,11], most of these  
85 data derive from observational studies in which dietary consumption is self-reported. Likewise,  
86 those who report adhering to Mediterranean versus Western diet patterns are different in other  
87 ways that may affect cognitive health (e.g., exercise, education, smoking behavior), making the  
88 process determining causal factors difficult.

89  
90 Psychosocial stress is associated with increased risk of AD and other dementias [12].  
91 Socioeconomic disparities are one of the clearest drivers of chronic psychosocial stress, and the  
92 gradient of health disparities resulting from stress may become steeper with age [13]. Low  
93 socioeconomic status (SES) increases risk of dementia, but the factors underlying this disparity  
94 are not well understood [14]. A number of pathways which are affected by stress that contribute  
95 to neurodegeneration and cognitive decline have been identified [15]. However, those high and  
96 low in SES differ in a number of ways that may influence health (e.g. physical activity, diet,  
97 education, income, neighborhood, reserve) complicating the process of uncovering  
98 mechanisms. Likewise, the effects of psychosocial stress may be temporally distant from the  
99 stressor and often are based on retrospective self-report [12,16].

100 Understanding how dietary patterns and stress profiles modify AD risk is key to identifying  
101 therapeutic targets. However, randomized clinical trials of long-term effects of diet are difficult  
102 and expensive, and randomized clinical trials of psychosocial stress effects on health are  
103 unethical. While transgenic rodent models have provided invaluable mechanistic insights into  
104 early-onset AD, they have been less helpful in understanding late-onset sporadic AD which  
105 accounts for about 95% of cases [17].

106  
107 Macaques share many neuroanatomical and neurophysiological characteristics with humans  
108 and have long been used as models of aging related cognitive decline [18-23]. Accumulating  
109 data indicate aging related neuropathologies like those observed in human AD also occur,  
110 suggesting that macaques may be promising models of sporadic AD [24,25]. Cynomolgus  
111 macaques (*Macaca fascicularis*), in particular, accumulate age-related cognitive deficits, brain  
112 amyloid, and tauopathies [26,27]. Age-related cognitive impairment has been associated with  
113 altered cerebrospinal fluid (CSF) biomarkers of AD-like pathology, including decreased beta-  
114 amyloid<sub>1-42</sub> and increased total and phosphorylated tau [28]. Also reminiscent of human health,  
115 diabetes mellitus is associated with accelerated age-related brain amyloid accumulation [29].  
116 When fed a Western diet, cynomolgus macaques develop chronic diseases of aging like  
117 humans, including coronary and carotid atherosclerosis, obesity, and type 2 diabetes [30].  
118 Macaque society is organized by social status hierarchies, and socially subordinate female  
119 macaques develop stress-related pathologies like humans, including coronary and carotid  
120 atherosclerosis, obesity, and depression [31], all of which increase AD risk in humans. Thus,  
121 these NHPs are appropriate models for investigations of diet and stress effects on the brain.

122  
123 Here, we report the effects of consumption of a Western-like versus Mediterranean-like diet and  
124 psychosocial stress on neuroanatomy in middle-aged, socially housed, dominant and  
125 subordinate cynomolgus macaques. We hypothesized that Western diet and the stress of social

126 subordination would result in structural changes in the brain. This long term randomized,  
127 controlled preclinical trial had a follow-up period of approximately 31 months. We measured the  
128 volumes of several whole brain and individual regions of interest, and cortical thicknesses and  
129 volumes in temporoparietal areas relevant to AD neuropathology [32]. We observed widespread  
130 neuroanatomical changes in the Western group and psychosocial stress effects on several  
131 regions relevant to AD, as well as temporally associated brain changes in all subjects likely due  
132 to aging. This work provides important insights into the effects of diet, psychosocial stress, and  
133 aging in the primate brain.

134

## 135 **2. METHODS**

### 136 2.1 Animals and Design

137 Middle-aged (11-13 years of age) female cynomolgus macaques were obtained (SNBL USA,  
138 Alice, Texas) and single-cage quarantined for one month in a room with visual and auditory  
139 contact, a routine procedure in animal facilities. Individuals were then moved to small social  
140 groups (N=4), housed in 3 x 3 x 3 m<sup>3</sup> indoor enclosures with exposure to natural light and a  
141 12/12 light-dark cycle (light phase: 0600-1800) and water *ad libitum*. During the period prior to  
142 the dietary intervention, animals received monkey chow.

143

144 Following a seven-month Baseline Phase, 42 monkeys were assigned to the two experimental  
145 diet groups (Mediterranean versus Western). The diet groups were balanced on age  
146 ( $X_{\text{MED}}=12.1$  y; range=11.1-13.6);  $X_{\text{WEST}}=12.2$  y; range=11.4-13.0), body weight, body mass  
147 index, age, basal cortisol concentration, and plasma lipid concentration as previously described  
148 [33]. See Supplementary Figure 1 for a schematic of the experimental design.

149

### 150 2.2 Ethics Statement

151 All procedures involving animals complied with the National Institutes of Health Guide for the  
152 Care and Use of Laboratory Animals (NIH Publications No. 8023, revised 1978), state, and  
153 federal laws, and were approved by the Animal Care and Use Committee of Wake Forest  
154 School of Medicine.

155

### 156 2.3 Social Status

157 During the Baseline Phase, animals adapted to their social groups and established stable social  
158 status hierarchies. Social status was unknown prior to group formation. Animals that were in the  
159 top half of their hierarchy, on average over the course of the experiment, were considered  
160 dominant, and all others subordinate. Dominants and subordinates were similar in age  
161 ( $X_{\text{SUB}}=11.9$  y; range=11.1-12.2);  $X_{\text{DOM}}=12.3$  y; range=11.1-13.6). As previously observed,  
162 social status hierarchies were stable across the duration of the experiment, with 92.5% of  
163 subjects maintaining their rank through the 31 months [34]. Subordinates were considered  
164 stressed because they received more aggression, were groomed less, spent more time alone,  
165 and had higher heart rates and cortisol concentrations than dominants (Shively et al., in press).

166

### 167 2.4 Experimental Diets

168 Macronutrient content of the diets is shown in Supplementary Table 1. The experimental diets  
169 have been previously described and differed considerably from monkey chow [33];  
170 (Supplementary Note 1). The Western diet was designed to mimic the diet typically consumed  
171 by American women (age 40-49), whereas the Mediterranean diet recapitulated key aspects of  
172 the human Mediterranean diet [7]. The experimental diets were matched on macronutrients and  
173 cholesterol content but differed significantly in fatty acids. Fats and proteins were mostly plant  
174 based in the Mediterranean diet [7], whereas fats and proteins were derived mostly from animal  
175 sources in the Western diet. This resulted in a high percentage of monounsaturated fats in the  
176 Mediterranean diet and saturated fats in the Western diet [7,35]. The Mediterranean diet was

177 higher in complex carbohydrates and fiber, and had a lower n-6:n-3 fatty acid ratio similar to a  
178 traditional hunter-gatherer type diet [35], and lower sodium and refined sugars than the Western  
179 diet. Key Mediterranean ingredients included English walnut powder and extra-virgin olive oil  
180 which were the primary components provided to participants in the PREDIMED study [36].  
181 Changes in body weight and composition resulting from the dietary intervention have been  
182 previously reported, and social status was not related to body weight or body composition [33].

183

## 184 2.5 Neuroimaging

### 185 2.5.1 Image Acquisition

186 Magnetic Resonance Imaging (MRI) scans were performed during the Baseline Phase and after  
187 31 months of dietary intervention. Animals were transferred to the MRI facility, sedated  
188 (ketamine HCl, 10-15 mg/kg body weight), and anesthesia was maintained by isoflurane (3%  
189 induction, 1.5% maintenance). We obtained T1-weighted anatomic images using a 3D  
190 volumetric MPRAGE sequence (TR=2700 msec; TE=3.39 msec; TI=880 msec; Flip Angle=8  
191 degrees; 160 slices, voxel dimension = 0.5 x 0.5 x 0.5 mm<sup>3</sup>) using a 3T Siemens Skyra scanner  
192 (Siemens, Erlangen, Germany) and a circularly polarized, 32-channel head coil with an internal  
193 diameter of 18.4 cm (Litzcage, Doty Scientific, SC).

194

### 195 2.5.2 Image Preprocessing

196 We first implemented bias field correction, denoising, and intensity normalization using the  
197 N4BiasFieldCorrection function of Advanced Normalization Tools (ANTs, Penn Image  
198 Computing and Science Laboratory, University of Pennsylvania, PA). Next, an initial whole-  
199 head, study specific template (SST) was created from the baseline scans for skull stripping  
200 using ANTs (antsMultivariateTemplateConstruction.sh) after rigid-body alignment to a UNC  
201 Primate Atlas [37]. We registered the UNC Template brain [37] to the SST brain and  
202 transformed the UNC parcellation map, brain mask, and segmentation priors to our SST using



203 deformable registration. The full parcellation consisted of separate definitions for the left and  
204 right hemisphere for the subcortical, frontal, prefrontal, cingulate, parietal, occipital, auditory,  
205 visual and limbic temporal lobes, as well as the brainstem, corpus callosum, and cerebellum.  
206 Cortical labels in the parcellation map included gray matter (GM), white matter (WM), and  
207 cerebrospinal fluid (CSF), and subcortical structures, including the hippocampus, amygdala,  
208 caudate and putamen.

209

### 210 2.5.3 Image Registration and Tissue Segmentation

211 To estimate longitudinal transformations, we performed within-subject registration of T1-  
212 weighted images across the data acquisition time points using ANTs nonlinear registration  
213 algorithm (antsRegistrationSyN.sh [38,39]). We then used longitudinal transformations to warp  
214 the Baseline brain masks to the Experimental time-point scans. By warping the parcellation map  
215 on SST, we generated individual parcellation maps for brain regions of interest (ROIs) for all  
216 time points. We performed an automatic brain segmentation into GM, WM, and CSF using  
217 probabilistic tissue maps from tissue priors generated in SST space.

218

### 219 2.6 Cortical Volume and Thickness in NHP AD Signature ROIs

220 In humans, an “AD signature” meta ROI, consisting of multiple ROIs for Alzheimer’s disease  
221 pathology, provides more reliable diagnostics of disease progression than do separate ROIs  
222 [32,40,41]. While volume- and thickness-based meta ROIs have been developed for humans,  
223 none exist for NHPs. Thus, we developed similar volume- and a thickness-based AD signature  
224 meta ROIs for NHPs using the angular gyrus, the inferior, middle, and superior temporal gyrus,  
225 entorhinal cortex, fusiform cortex, supramarginal gyrus, precuneus, and parahippocampus. We  
226 determined the thickness and volume of each ROI using the macaque template from the  
227 Scalable Brain Atlas [42] by warping the Atlas to subject’s native T1w MR images. We used the  
228 “KellyKapowski” tool included with ANTs 2.2.0. which is a wrapper for the DiReCT tool, a

229 registration-based estimate of cortical thickness [43]. The thickness meta ROI was calculated as  
230 the volume-weighted average of the thicknesses of the individual ROIs to take into account the  
231 overall size of individual regions. The volume meta ROI was calculated as the sum of all the  
232 individual ROIs. All ROIs analyzed are listed in Supplementary Table 2.

233

## 234 2.7 Statistical Analysis

235 For each ROI, we conducted two sets of analyses: 1) Repeated measures ANOVAs to examine  
236 changes over the course of the experiment and 2) ANCOVAs with the baseline ROI used as a  
237 covariate to provide the best estimate of effect sizes. In our analyses of intracranial (ICV) and  
238 total brain (TBV) volumes, we used body weight as a covariate to control for inter-individual  
239 variation in body size. For the remaining volumes, we included ICV as a covariate to control for  
240 inter-individual variation in head size. Analyses of cortical thickness did not include a control  
241 variable because thicknesses are independent of head size [32].

242

243 All models included a factor for diet (Mediterranean and Western) and status (dominant and  
244 subordinate). In repeated measures analyses, we also included a factor for “time” (Baseline and  
245 Experimental). For volumes represented by two hemispheric measurements, we included a  
246 factor for “hemisphere” (left and right). We analyzed the resulting full models – i.e., all main and  
247 interaction effects – and then eliminated the non-significant ( $p > 0.05$ ) four-way, and then three-  
248 way interactions. Next, we inspected models for hemispheric interactions. If present, we  
249 analyzed the right and left ROIs separately. If absent, we analyzed the ROI as a single structure  
250 with repeated measures. This stepwise approach allowed us to focus on the main and  
251 interaction effects of diet and status over time.

252

## 253 3. RESULTS

254 A total of 38 animals are included in the analysis ( $N_{\text{WEST}}=21$ , 11 dominant, 10 subordinate;  
255  $N_{\text{MED}}=17$ , 10 dominant, 7 subordinate). Two animals did not tolerate the experimental diets,  
256 were fed standard monkey chow and excluded from analyses reported here, and two animals  
257 died during the study (Supplementary Note 2).

258

259 Whole brain ROIs included segmentations for GM, WM, CSF, total brain (TBV;  $TBV = GM +$   
260  $WM$ ), and intracranial volumes (ICV;  $ICV = GM + WM + CSF$ ). The AD signature meta ROIs  
261 included only GM tissue, whereas UNC ROIs included GM, WM and CSF. So, while analyses of  
262 the AD signature ROIs focused on GM, analyses of the UNC ROIs illustrated the effects in  
263 larger brain regions that included all three types of tissue.

264

### 265 3.1 Whole Brain Volume ROIs

#### 266 3.1.2 Diet Effects

267 Significant diet by time interactions were observed for several whole brain regions. In the  
268 Western group, volumes of CSF (diet x time:  $F(1,35)=8.859$ ;  $p=0.005$ ; Tukey  $p=0.001$ ) and WM  
269 (diet x time:  $F(1,35)=7.826$ ;  $p=0.008$ ; Tukey  $p=0.021$ ) decreased over time, whereas TBV (diet  
270 x time:  $F(1,35)=6.679$ ;  $p=0.014$ ; Tukey  $p=0.001$ ) and GM (diet x time:  $F(1,35)=8.739$ ;  $p=0.006$ ;  
271 Tukey  $p=0.001$ ) increased over time (Figure 1). ICV did not significantly change over time (diet x  
272 time:  $F(1,35)=0.239$ ;  $p=0.628$ ). ANCOVAs controlling for baseline measures showed that the  
273 Western group had larger TBV ( $F(1,33)=12.515$ ;  $p=0.001$ ) and GM ( $F(1,33)=10.830$ ;  $p=0.002$ ),  
274 and smaller CSF ( $F(1,33)=8.448$ ;  $p=0.006$ ) and WM ( $F(1,33)=6.717$ ;  $p=0.014$ ) volumes. ICV did  
275 not differ between diet groups ( $F(1,33)=3.047$ ;  $p=0.090$ ).

276

#### 277 3.1.3 Status Effects

278 ICV and TBV differed by social status. After controlling for differences in body size, repeated  
279 measures analyses showed that dominants had larger ICV ( $F(1,34)=13.805$ ;  $p=0.001$ ) (Figure  
280 2A) and TBV ( $F(1,34)=11.497$ ;  $p=0.002$ ) than subordinates (Figure 2B).

281

### 282 3.1.4 Diet by Status Interaction

283 No significant diet by time interactions were observed for whole brain volume ROIs.

284

## 285 3.2 AD Signature ROIs - Cortical Thicknesses

### 286 3.2.1 Diet Effects

287 The entorhinal cortex was the only structure in which the left and right sides differed and for  
288 which separate analyses was required. Excluding the right entorhinal cortex (diet x time:  
289  $F(1,35)=0.012$ ,  $p=0.914$ ), cortical thicknesses significantly increased in the Western group,  
290 whereas cortical thicknesses remained stable over time in the Mediterranean group (Figure 3;  
291 Supplementary Table 3).

292

293 After controlling for inter-individual differences at baseline, ANCOVAs revealed that cortical  
294 thicknesses were larger in the Western than the Mediterranean group for most ROIs (Figure 4):  
295 angular gyrus ( $F(1,34)=13.120$ ,  $p<0.001$ ), inferior temporal gyrus ( $F(1,34)=8.347$ ,  $p=0.007$ ),  
296 superior temporal gyrus ( $F(1,34)=18.311$ ,  $p<0.001$ ), supramarginal gyrus ( $F(1,34)=16.230$ ,  
297  $p<0.001$ ), precuneus ( $F(1,34)=9.702$ ,  $p=0.003$ ), middle temporal gyrus ( $F(1,34)=13.211$ ,  
298  $p=0.001$ ), parahippocampus ( $F(1,34)=4.4140$ ;  $p=0.043$ ), and the meta ROI ( $F(1,34)=14.311$ ,  
299  $p=0.001$ ). We detected a side by diet interaction effect for the entorhinal cortex. The Western  
300 group had larger left entorhinal cortices than the Mediterranean group ( $F(1,33)=6.316$ ,  $p=0.017$ ),  
301 whereas the right entorhinal cortices did not differ between diet groups ( $F(1,33)=0.008$ ,  
302  $p=0.978$ ).

303

304 3.2.2 Status Effects

305 Neither the repeated measures analyses nor the ANCOVAs controlling for baseline revealed  
306 any effects of status on cortical thickness.

307

308 3.2.3 Diet by Status Interaction

309 No significant diet by time interactions were observed for the AD-signature cortical thicknesses.

310

311 3.3 AD Signature ROIs - Cortical Volumes

312 3.3.1 Diet Effects

313 Repeated measures analyses of AD-signature cortical volumes revealed significant increases  
314 over time in the right inferior temporal gyri (diet x time:  $F(1,35)=6.606$ ;  $p=0.015$ ; Tukey=0.006)  
315 and right entorhinal cortices (diet x time:  $F(1,35)=4.582$ ;  $p=0.039$ ; Tukey=0.365) in the Western  
316 group. After controlling for baseline, ANCOVA revealed several main effects of diet. The  
317 Western group had larger right inferior temporal gyri ( $F(1,33)=10.494$ ;  $p=0.002$ ), right superior  
318 temporal gyri ( $F(1,33)=5.6090$ ;  $p=0.024$ ), and right meta ROIs ( $F(1,33)=8.179$ ;  $p=0.007$ ).  
319 These ROIs did not differ by diet on the left side of the brain ( $p's>0.05$ ; data not shown).

320

321 3.3.2 Status Effects

322 Repeated measures analyses did not detect any significant effects of social status. ANCOVAs  
323 indicated that subordinates had larger volumes than dominants in the left and right middle  
324 temporal gyri ( $F(1,35)=6.792$ ;  $p=0.013$ ), left inferior temporal gyri ( $F(1,33)=6.9437$ ;  $p=0.013$ ),  
325 and left meta ROIs ( $F(1,33)=4.677$ ;  $p=0.038$ ) (Figure 2C-E).

326

327 3.3.3 Diet by Status Interaction

328 No significant diet by time interactions were observed for the AD-signature cortical volumes.

329

330 3.4 UNC ROIs

331 3.4.1 Diet Effects

332 There were no significant interactions of diet by time for UNC ROIs using repeated measures  
333 analyses ( $p$ 's>0.05, data not shown). After controlling for baseline, ANCOVA revealed that right  
334 caudate volumes were larger in the Western than the Mediterranean group ( $F(1,33)=4.254$ ;  
335  $p=0.047$ ) (Figure 5).

336

337 3.4.2 Status Effects

338 Neither the repeated measures analyses nor the ANCOVAs controlling for baseline revealed  
339 any main effects of status on any UNC ROI.

340

341 3.4.3 Diet by Status Interaction

342 We detected a diet by status interaction for left frontal volumes ( $F(1,33)=4.143$ ;  $p=0.050$ ).  
343 Dominants and subordinates did not differ in the Western group (Tukey  $p=0.662$ ); however, in  
344 the Mediterranean group, subordinates had larger frontal volumes than dominants (Tukey  $p=$   
345  $0.039$ ) (Figure 6).

346

347 3.4.4 Time Effects

348 We detected several main effects of time indicating cohort-wide volumetric changes in ROIs  
349 over the 31-month experimental period (Table 1). Most ROIs decreased. However, the caudate  
350 ( $F(1,112)= 10.034$ ;  $p=0.002$ ) and putamen ( $F(1,112)=6.086$ ;  $p=0.015$ ) volumes increased.

351

352

353 **4. DISCUSSION**

354 The goal of this longitudinal, randomized, dietary intervention was to identify mid-life changes in  
355 brain structure due to either stress or diet that are associated with AD risk. Female cynomolgus

356 macaques have an average lifespan of 25 years [44], thus our 11-13 year old cohort were  
357 similar in biological age to middle-aged premenopausal women. Middle-age is of particular  
358 interest because mounting evidence suggests that structural brain changes in those later  
359 diagnosed with AD may begin decades before onset of symptoms [45]. Our findings add to a  
360 growing body of evidence that diet and psychosocial stress have profound effects on the brain.  
361 Western diet resulted in greater cortical thicknesses, total brain volumes and gray matter, and  
362 diminished CSF and white matter volumes. Socially stressed subordinates had smaller whole  
363 brain volumes but larger ROIs relevant to AD than dominants. These results provide a  
364 foundation upon which future studies can help determine how diet and psychosocial stress  
365 influence risk for neurodegenerative disorders such as AD.

366

#### 367 4.1 Diet Effects

368 In support of our hypothesis that Western diets promote neuroanatomical changes, the Western  
369 group exhibited increased GM volume as well as cortical thicknesses in temporoparietal regions  
370 relevant to AD neuropathology. This may seem counterintuitive as large GM and cortical volumes  
371 are often assumed to indicate a healthy brain. Our cohort consisted of 11 to 13-year-old  
372 monkeys, roughly comparable to 35 to 50-year-old humans, which may be too young for  
373 development of AD-like neuropathology. However, mounting evidence suggests that early,  
374 preclinical increases in GM may portend AD later in life [46-48]. The biological mechanisms  
375 underlying increased GM volume and cortical thickening require further study; however, they  
376 may reflect neuroinflammatory responses, as increases in GM volumes [49] and cortical  
377 thickening [50] have been associated with neuroinflammation in recent clinical studies. Western  
378 diets are pro-inflammatory [11,51], and we previously reported that circulating monocytes  
379 isolated from the Western group had pro-inflammatory gene expression profiles relative to those  
380 from the Mediterranean group [52]. We also reported that the Western group had lower rates of  
381 affiliation and social integration and higher rates of anxiety and social isolation than the

382 Mediterranean group, suggesting that diet impacted the brain [52]. Importantly, social isolation  
383 and anxiety are risk factors for dementia [53]. Considering these observations, it is possible that  
384 the Western diet induced neuroinflammation that promoted macrostructural changes, and that  
385 the enlarged cortical and other GM structures observed here reflect an early transition from  
386 normal to pathological aging. Chronic inflammation is increasingly recognized as a key  
387 mechanism in AD [54]. These observations underscore the need for longitudinal MRI studies in  
388 humans that span the range of normal to MCI to AD.

389  
390 WM volumes decreased in the Western group but remained stable in the Mediterranean group.  
391 Changes in WM volumes are some of the earliest biomarkers of AD neuropathology [5,55].  
392 Pathways associated with oxidative damage to oligodendrocytes may play a role in the  
393 associations between diet, WM aberrations, and AD [55]. Over time, damage to  
394 oligodendrocytes may culminate in the pathogenesis of WM abnormalities and subsequent  
395 neurodegenerative disease. The lack of changes in WM in the Mediterranean group may reflect  
396 the protective actions of antioxidants in the diet. Recent research in NHPs has shown that  
397 consumption of the antioxidant curcumin improves WM integrity [56]. Mediterranean diets are  
398 high in polyphenols, compounds that act as both antioxidants and anti-inflammatory agents [10].  
399 The PREDIMED study demonstrated associations of Mediterranean diet with increases in the  
400 activity of endogenous antioxidants [57]. Thus, antioxidant properties of the Mediterranean diet  
401 may protect WM.

402  
403 The Western group had larger caudates than the Mediterranean group. In humans, the caudate  
404 is part of the salience network, a circuit involved in the regulation of consumptive behavior [58].  
405 We previously reported that the Western group consumed more calories and accumulated  
406 higher body fat percentages than the Mediterranean group [30]. These observations suggest



407 that Western diets may alter neural networks in ways that promote over-eating and obesity, an  
408 important risk factor for AD [1].

409

#### 410 4.2 Psychosocial Stress Effects

411 Stressed subordinates had smaller overall brain volumes and larger volumes of temporoparietal  
412 ROIs relevant to AD neuropathology. These results add to a body of literature showing that  
413 chronic exposure to psychosocial stress is associated with structural changes in the brain [59].  
414 While this is the first report of social status differences in whole brain volumes in NHPs, much  
415 work has reported associations between brain volumes and stress. Subordinates also had  
416 volumetric increases in the middle and inferior temporal gyri, and the meta-ROI. Longitudinal  
417 studies are needed to determine whether the volumetric differences observed here precede  
418 functional impairments. Several plausible mechanisms may underlie these stress-associated  
419 volumetric changes, including neuroinflammation [60], neuronal remodeling [61], or neuronal  
420 apoptosis [62]. Further studies are needed to elucidate pathways mediating the relationships  
421 between psychosocial stress and brain volumes.

422

#### 423 4.3 Diet –Status Interaction Effects

424 Left frontal volumes were smaller in dominants than subordinates in the Mediterranean group,  
425 whereas they were not different in the Western group, with volumes falling about midway  
426 between the Mediterranean dominants and subordinates. It may be that Western diet diminishes  
427 differences between dominants and subordinates. Additional study is needed to replicate and  
428 explore this observation.

429

#### 430 4.4 Aging Effects

431 In addition to the effects of diet and psychosocial stress, several ROI volumes decreased over  
432 time. On average, about 2.7 years passed between the MRI scans, a timespan approximating

433 an 8-10 year follow up in humans [44]. These trends may well reflect changes associated with  
434 the process of aging. Similar changes in brain volumes have been demonstrated in longitudinal  
435 clinical surveys [63]. Changes in autonomic nervous system and hypothalamic-pituitary-adrenal  
436 (HPA) function also reflected the aging process in this cohort (Shively et al., in press). These  
437 cohort-wide changes are notable because they occurred at ages that roughly translate to 40-49  
438 year old women – a period of time that has been hypothesized to represent a critical period for  
439 the development of AD-related neuropathologies [5].

440

#### 441 4.5 Strengths, Challenges, & Limitations

442 Strengths of our study include the longitudinal design, careful control of the dietary  
443 manipulation, and a focus on a limited number of regions of interest. Notwithstanding these  
444 strengths, there were limitations to this study. The Mediterranean diet was developed  
445 specifically for this study; thus, this diet was a new formulation. Females were the focus of study  
446 because the prevalence of AD is higher in women than in men [17], there are sex differences in  
447 etiology [72], and there are sex differences in health responses to social stressors. Thus, a  
448 direct comparisons using the same stressor was not scientifically defensible [64]. Repeated  
449 longitudinal MRI scans may have more specifically pinpointed the timing of the observed effects  
450 but were beyond the scope of this project. Cognitive assessments would provide an opportunity  
451 to determine structure-function relationships but were not included as they require food  
452 restriction, food reward, and social separation for testing, all of which were incompatible with our  
453 study goals and design. Future studies are planned to replicate these observations in males,  
454 conduct scans more frequently, and assess cognitive function.

455

#### 456 4.6 Conclusions

457 These results suggest that persistent psychosocial stress and Western diet consumption result  
458 in macrostructural changes in the brain. The associations between Western diet and brain

459 changes may be due, in part, to changes in proinflammatory pathways that induce structural  
460 changes in the brain. In contrast, the anti-inflammatory and antioxidant properties of  
461 Mediterranean diets may underlie their protective effects. However, these hypotheses need to  
462 be confirmed with further neurobiological phenotyping, which is underway. Future studies using  
463 innovative molecular approaches, alternative imaging modalities, and novel biomarkers are  
464 necessary to characterize the temporal emergence of neuropathological changes. Such work  
465 will help to identify resilient versus at-risk phenotypes during middle age, so that intervention  
466 can occur before the development of mild cognitive impairment, AD, and dementia.

467

468

#### 469 **ACKNOWLEDGMENTS**

470 This work was supported by the NIH (R01-HL087103 (CAS), RF1-AG058829 (CAS & SC), R01-  
471 HL122393 (TCR), and U24-DK097748 (TCR), an Intramural Grant from the Department of  
472 Pathology, the Wake Forest Alzheimer's Disease Research Center (P30-AG049638) and the  
473 Wake Forest Claude D. Pepper Older Americans For Independence Center (P30 AG21332).  
474 The authors also would like to acknowledge the contributions of the Wake Forest Clinical and  
475 Translational Science Institute.

476

477

478 **DECLARATIONS OF INTEREST:** none

479 **REFERENCES**

- 480 [1] Qizilbash N, Gregson J., Johnson M.E., Pearce N., Douglas I., Wing K., et al. BMI  
481 and risk of dementia in two million people over two decades: a retrospective cohort  
482 study. *Lancet Diabetes Endocrinol* 2015;3:431–6. doi:10.1016/S2213-  
483 8587(15)00033-9.
- 484 [2] Fung T.T., Schulze M., Manson J.E., Willett W.C., Hu F.B. Dietary patterns, meat  
485 intake, and the risk of type 2 diabetes in women. *Arch Intern Med* 2004;164:2235–  
486 40. doi:10.1001/archinte.164.20.2235.
- 487 [3] Procaccini C., Carbone F., Galgani M., La Rocca C., De Rosa V., Cassano S., et al.  
488 Obesity and susceptibility to autoimmune diseases. *Expert Rev Clin Immunol*  
489 2011;7:287–94. doi:10.1586/eci.11.18.
- 490 [4] Rodríguez-Monforte M., Flores-Mateo G., Sánchez E. Dietary patterns and CVD: a  
491 systematic review and meta-analysis of observational studies. *Br J Nutr*  
492 2015;114:1341–59. doi:10.1017/S0007114515003177.
- 493 [5] Ritchie K., Ritchie C.W., Yaffe K., Skoog I., Scarmeas N. Is late-onset Alzheimer's  
494 disease really a disease of midlife? *Alzheimer's & Dementia: Translational*  
495 *Research & Clinical Interventions* 2015;1:122–30. doi:10.1016/j.trci.2015.06.004.
- 496 [6] Jacka F.N., Cherbuin N., Anstey K.J., Sachdev P., Butterworth P. Western diet is  
497 associated with a smaller hippocampus: a longitudinal investigation. *BMC Med*  
498 2015;13:215–8. doi:10.1186/s12916-015-0461-x.
- 499 [7] Kafatos A., Verhagen H., Moschandreas J., Apostolaki I., Van Westerop J.J.  
500 Mediterranean diet of Crete: foods and nutrient content. *J Am Diet Assoc*  
501 2000;100:1487–93. doi:10.1016/s0002-8223(00)00416-8.
- 502 [8] Singh B., Parsaik A.K., Mielke M.M., Erwin P.J., Knopman D.S., Petersen R.C., et  
503 al. Association of Mediterranean diet with mild cognitive impairment and

- 504 Alzheimer's disease: a systematic review and meta-analysis. *J Alzheimers Dis*  
505 2014;39:271–82. doi:10.3233/JAD-130830.
- 506 [9] Scarmeas N., Stern Y., Tang M.X., Mayeux R., Luchsinger J.A. Mediterranean diet  
507 and risk for Alzheimer's disease. *Ann Neurol* 2006;59:912–21.  
508 doi:10.1002/ana.20854.
- 509 [10] Román G.C., Jackson R.E., Gadhia R., Román A.N., Reis J. Mediterranean diet:  
510 The role of long-chain  $\omega$ -3 fatty acids in fish; polyphenols in fruits, vegetables,  
511 cereals, coffee, tea, cacao and wine; probiotics and vitamins in prevention of stroke,  
512 age-related cognitive decline, and Alzheimer disease. *Rev Neurol (Paris)*  
513 2019;175:724–41. doi:10.1016/j.neurol.2019.08.005.
- 514 [11] Hsu T.M., Kanoski S.E. Blood-brain barrier disruption: mechanistic links between  
515 Western diet consumption and dementia. *Front Aging Neurosci* 2014;6:88.  
516 doi:10.3389/fnagi.2014.00088.
- 517 [12] Johansson L., Guo X., Hällström T., Norton M.C., Waern M., Ostling S., et al.  
518 Common psychosocial stressors in middle-aged women related to longstanding  
519 distress and increased risk of Alzheimer's disease: a 38-year longitudinal  
520 population study. *BMJ Open* 2013;3:e003142. doi:10.1136/bmjopen-2013-003142.
- 521 [13] Sapolsky R.M., Krey L.C., McEwen B.S. The neuroendocrinology of stress and  
522 aging: the glucocorticoid cascade hypothesis. *Endocrine Reviews* 1986;7:284–301.  
523 doi:10.1210/edrv-7-3-284.
- 524 [14] Deckers K., Cadar D., van Boxtel M.P.J., Verhey F.R.J., Steptoe A., Köhler S.  
525 Modifiable Risk Factors Explain Socioeconomic Inequalities in Dementia Risk:  
526 Evidence from a Population-Based Prospective Cohort Study. *J Alzheimers Dis*  
527 2019;71:549–57. doi:10.3233/JAD-190541.

- 528 [15] Daulatzai M.A. Neurotoxic saboteurs: straws that break the hippo's (hippocampus)  
529 back drive cognitive impairment and Alzheimer's disease. *Neurotox Res*  
530 2013;24:407–59. doi:10.1007/s12640-013-9407-2.
- 531 [16] Wilson R.S., Arnold S.E., Schneider J.A., Kelly J.F., Tang Y., Bennett D.A. Chronic  
532 psychological distress and risk of Alzheimer's disease in old age. *Ned*  
533 2006;27:143–53. doi:10.1159/000095761.
- 534 [17] Alzheimer's Association. 2020 Alzheimer's Disease Facts and Figures. vol. 16.  
535 Alzheimer's Association.
- 536 [18] Moss M.B., Rosene D.L., Peters A. Effects of aging on visual recognition memory in  
537 the rhesus monkey. *Neurobiology of Aging* 1988;9:495–502. doi:10.1016/s0197-  
538 4580(88)80103-9.
- 539 [19] Herndon J.G., Moss M.B., Rosene D.L., Killiany R.J. Patterns of cognitive decline in  
540 aged rhesus monkeys. *Behavioural Brain Research* 1997;87:25–34.  
541 doi:10.1016/s0166-4328(96)02256-5.
- 542 [20] Baxter M.G. Cognitive aging in nonhuman primates. *Functional Neurobiology of*  
543 *Aging*, Elsevier; 2001, pp. 407–19. doi:10.1016/B978-012351830-9/50028-7.
- 544 [21] Morrison JH., Baxter M.G. The ageing cortical synapse: hallmarks and implications  
545 for cognitive decline. *Nat Rev Neurosci* 2012;13:240–50. doi:10.1038/nrn3200.
- 546 [22] Wang M., Gamo N.J., Yang Y., Jin L.E., Wang X.J., Laubach M., et al. Neuronal  
547 basis of age-related working memory decline. *Nature* 2011;476:210–3.  
548 doi:10.1038/nature10243.
- 549 [23] Kubicki M., Baxi M., Pasternak O., Tang Y., Karmacharya S., Chunga N., et al.  
550 Lifespan trajectories of white matter changes in rhesus monkeys. *Cereb Cortex*  
551 2019;29:1584–93. doi:10.1093/cercor/bhy056.
- 552 [24] Arnsten A.F.T., Datta D., Leslie S., Yang S-T., Wang M., Nairn A.C. Alzheimer's-  
553 like pathology in aging rhesus macaques: Unique opportunity to study the etiology

- 554 and treatment of Alzheimer's disease. Proceedings of the National Academy of  
555 Sciences 2019;116:26230–8. doi:10.1073/pnas.1903671116.
- 556 [25] Paspalas C.D., Carlyle B.C., Leslie S., Preuss T.M., Crimins J.L., Huttner A.J., et al.  
557 The aged rhesus macaque manifests Braak stage III/IV Alzheimer's-like pathology.  
558 Alzheimers Dement 2018;14:680–91. doi:10.1016/j.jalz.2017.11.005.
- 559 [26] Darusman H.S., Gjedde A., Sajuthi D., Schapiro S.J., Kalliokoski O., Kristianingrum  
560 Y.P., Handaryani E., Hau J. Amyloid beta1-42 and the phosphorylated tau threonine  
561 231 in brains of aged cynomolgus monkeys (*Macaca fascicularis*). Front Aging  
562 Neurosci 2014;6:313. doi:10.3389/fnagi.2014.00313.
- 563 [27] Darusman H.S. Agungpriyono D.R., Kusumaputri V.A., Sajuthi D., Schapiro S.J.,  
564 Hau J. Granulovacuolar degeneration in brains of senile cynomolgus monkeys.  
565 Front Aging Neurosci 2019;11:50. doi:10.3389/fnagi.2019.00050
- 566 [28] Darusman H.S., Pandelaki J., Mulyadi R., Sajuthi D., Putri I.A., Klalliokoski O.H., et  
567 al. Poor memory performance in aged cynomolgus monkeys with hippocampal  
568 atrophy, depletion of amyloid beta 1-42 and accumulation of tau proteins in  
569 cerebrospinal fluid. In Vivo 2014;28:173–84.
- 570 [29] Okabayashi S., Shimozawa N., Yasutomi Y., Yanagisawa K., Kimura N. Diabetes  
571 mellitus accelerates A $\beta$  pathology in brain accompanied by enhanced GA $\beta$   
572 generation in nonhuman primates. PLoS ONE 2015;10:e0117362.  
573 doi:10.1371/journal.pone.0117362.
- 574 [30] Bauer S.A., Arndt T.P., Leslie K.E., Pearl D.L., Turner P.V. Obesity in rhesus and  
575 cynomolgus macaques: a comparative review of the condition and its implications  
576 for research. Comparative Medicine 2011;61:514–26.
- 577 [31] Shively C.A., Register T.C., Clarkson T.B. Social stress, visceral obesity, and  
578 coronary artery atherosclerosis: product of a primate adaptation. Am J Primatol  
579 2009;71:742–51. doi:10.1002/ajp.20706.

- 580 [32] Schwarz C.G., Gunter J.L., Wiste H.J., Przybelski S.A., Weigand S.D., Ward C.P.,  
581 et al. A large-scale comparison of cortical thickness and volume methods for  
582 measuring Alzheimer's disease severity. *NeuroImage: Clinical* 2016;11:802–12.  
583 doi:10.1016/j.nicl.2016.05.017.
- 584 [33] Shively C.A., Appt S.E., Vitolins M.Z., Uberseder B., Michalson K.T., Silverstein-  
585 Metzler M.G., et al. Mediterranean versus Western diet effects on caloric intake,  
586 obesity, metabolism, and hepatosteatosis in nonhuman primates. *Obesity* (Silver  
587 Spring) 2019;27:777–84. doi:10.1002/oby.22436.
- 588 [34] Shively C.A., Kaplan J.R. Stability of social status rankings of female cynomolgus  
589 monkeys, of varying reproductive condition, in different social groups. *Am J*  
590 *Primatol* 1991;23:239–45. doi:10.1002/ajp.1350230404.
- 591 [35] Cordain L., Eaton S.B., Sebastian A., Mann N., Lindeberg S., Watkins B.A., et al.  
592 Origins and evolution of the Western diet: health implications for the 21st century.  
593 *Am J Clin Nutr* 2005;81:341–54. doi:10.1093/ajcn.81.2.341.
- 594 [36] Estruch R., Ros E., Salas-Salvadó J., Covas M.I., Corella D., Arós F., et al. Primary  
595 prevention of cardiovascular disease with a Mediterranean diet supplemented with  
596 extra-virgin olive oil or nuts. *N Engl J Med* 2018;378:e34.  
597 doi:10.1056/NEJMoa1800389.
- 598 [37] Styner M., Knickmeyer R., Joshi S., Coe C., Short S.J., Gilmore J. Automatic brain  
599 segmentation in rhesus monkeys. In: Pluim JPW., Reinhardt JM., editors. *Medical*  
600 *Imaging 2007: Image Processing*, vol. 6512, International Society for Optics and  
601 *Photonics*; 2007, p. 65122L. doi:10.1117/12.710027.
- 602 [38] Avants B., Gee J.C. Geodesic estimation for large deformation anatomical shape  
603 averaging and interpolation. *Neuroimage* 2004;23 Suppl 1:S139–50.  
604 doi:10.1016/j.neuroimage.2004.07.010.



- 605 [39] Avants B.B., Tustison N.J., Song G., Cook P.A., Klein A., Gee J.C. A reproducible  
606 evaluation of ANTs similarity metric performance in brain image registration.  
607 Neuroimage 2011;54:2033–44. doi:10.1016/j.neuroimage.2010.09.025.
- 608 [40] Fan Y., Resnick S.M., Wu X., Davatzikos C. Structural and functional biomarkers of  
609 prodromal Alzheimer's disease: a high-dimensional pattern classification study.  
610 Neuroimage 2008;41:277–85. doi:10.1016/j.neuroimage.2008.02.043.
- 611 [41] Ortiz A., Górriz J.M., Ramírez J., Martínez-Murcia F.J., Alzheimer's Disease  
612 Neuroimaging Initiative. Automatic ROI selection in structural brain MRI using SOM  
613 3D projection. PLoS ONE 2014;9:e93851. doi:10.1371/journal.pone.0093851.
- 614 [42] Bakker R., Tiesinga P., Kötter R. The Scalable Brain Atlas: Instant Web-Based  
615 Access to Public Brain Atlases and Related Content. Neuroinformatics  
616 2015;13:353–66. doi:10.1007/s12021-014-9258-x.
- 617 [43] Das S.R., Avants B.B., Grossman M., Gee J.C. Registration based cortical  
618 thickness measurement. Neuroimage 2009;45:867–79.  
619 doi:10.1016/j.neuroimage.2008.12.016.
- 620 [44] Hakeem A., Sandoval R., Jones M., Allman J. Brain and life span in primates. In:  
621 Birren J., editor. Handbook of the Psychology of Aging; 1996, pp. 78–104.
- 622 [45] Palmqvist S., Janelidze S., Quiroz Y.T., Zetterberg H., Lopera F., Stomrud E., et al.  
623 Discriminative accuracy of plasma phospho-tau217 for Alzheimer's disease vs other  
624 neurodegenerative disorders. Jama 2020. doi:10.1001/jama.2020.12134.
- 625 [46] Fortea J., Sala-Llonch R., Bartrés-Faz D., Bosch B., Lladó A., Bargalló N., et al.  
626 Increased cortical thickness and caudate volume precede atrophy in PSEN1  
627 mutation carriers. JAD 2010;22:909–22. doi:10.3233/JAD-2010-100678.
- 628 [47] Pegueroles J., Vilaplana E., Montal V., Sampedro F., Alcolea D., Carmona-Iragui  
629 M., et al. Longitudinal brain structural changes in preclinical Alzheimer's disease.  
630 Alzheimers Dement 2017;13:499–509. doi:10.1016/j.jalz.2016.08.010.

- 631 [48] Montal V., Vilaplana E., Alcolea D., Pegueroles J., Pasternak O., González-Ortiz S.,  
632 et al. Cortical microstructural changes along the Alzheimer's disease continuum.  
633 *Alzheimers Dement* 2018;14:340–51. doi:10.1016/j.jalz.2017.09.013.
- 634 [49] Gispert J.D., Suárez Calvet M., Monté G.C., Tucholka A., Falcon C., Rojas S., et al.  
635 Cerebrospinal fluid sTREM2 levels are associated with gray matter volume  
636 increases and reduced diffusivity in early Alzheimer's disease. *Alzheimers Dement*  
637 2016;12:1259–72. doi:10.1016/j.jalz.2016.06.005.
- 638 [50] Batzu L., Westman E., Pereira J.B., Alzheimer's Disease Neuroimaging Initiative.  
639 Cerebrospinal fluid progranulin is associated with increased cortical thickness in  
640 early stages of Alzheimer's disease. *Neurobiology of Aging* 2020;88:61–70.  
641 doi:10.1016/j.neurobiolaging.2019.12.012.
- 642 [51] Christ A., Günther P., Lauterbach M.A.R., Duewell P., Biswas D., Pelka K., et al.  
643 Western diet triggers NLRP3-dependent innate immune reprogramming. *Cell*  
644 2018;172:162–175.e14. doi:10.1016/j.cell.2017.12.013.
- 645 [52] Johnson C.S.C., Shively C.A., Michalson K.T., Lea A.J., DeBo R.J., Howard T.D., et  
646 al. Divergent effects of Western and Mediterranean diets on behavior and monocyte  
647 polarization. *bioRxiv* 2020;8:2020.01.27.917567. doi:10.1101/2020.01.27.917567.
- 648 [53] Poey J.L., Burr J.A., Roberts J.S. Social connectedness, perceived isolation, and  
649 dementia: Does the social environment moderate the relationship between genetic  
650 risk and cognitive well-being? *Gerontologist* 2017;57:1031–40.  
651 doi:10.1093/geront/gnw154.
- 652 [54] Kinney J.W., Bemiller S.M., Murtishaw A.S., Leisgang A.M., Salazar A.M., Lamb  
653 B.T. Inflammation as a central mechanism in Alzheimer's disease. *Alzheimer's &*  
654 *Dementia: Translational Research & Clinical Interventions* 2018;4:575–90.  
655 doi:10.1016/j.trci.2018.06.014.

- 656 [55] Nasrabad S.E., Rizvi B., Goldman J.E., Brickman A.M. White matter changes in  
657 Alzheimer's disease: a focus on myelin and oligodendrocytes. *Acta Neuropathol*  
658 *Commun* 2018;6:1–10. doi:10.1186/s40478-018-0515-3.
- 659 [56] Koo B.B., Calderazzo S., Bowley B.G.E., Kolli A., Moss M.B., Rosene D.L., et al.  
660 Long-term effects of curcumin in the non-human primate brain. *Brain Research*  
661 *Bulletin* 2018;142:88–95. doi:10.1016/j.brainresbull.2018.06.015.
- 662 [57] Sureda A., Bibiloni M.D.M., Martorell M., Buil-Cosiales P., Marti A., Pons A., et al.  
663 Mediterranean diets supplemented with virgin olive oil and nuts enhance plasmatic  
664 antioxidant capabilities and decrease xanthine oxidase activity in people with  
665 metabolic syndrome: The PREDIMED study. *Mol Nutr Food Res* 2016;60:2654–64.  
666 doi:10.1002/mnfr.201600450.
- 667 [58] Haber S.N. Neuroanatomy of Reward: A View from the Ventral Striatum. In:  
668 Gottfried JA., editor. *Neurobiology of Sensation and Reward*, Boca Raton (FL):  
669 CRC Press/Taylor & Francis; 2011. Chapter 11, Available from:  
670 <https://www.ncbi.nlm.nih.gov/books/NBK92777/>
- 671 [59] Willard S.L., Friedman D.P., Henkel C.K., Shively C.A. Anterior hippocampal  
672 volume is reduced in behaviorally depressed female cynomolgus macaques.  
673 *Biomedicine & Pharmacotherapy* 2009;34:1469–675.
- 674 [60] Calcia M.A., Bonsall D.R., Bloomfield P.S., Selvaraj S., Barichello T., Howes OD.  
675 Stress and neuroinflammation: a systematic review of the effects of stress on  
676 microglia and the implications for mental illness. *Psychopharmacology*  
677 2016;233:1637–50. doi:10.1007/s00213-016-4218-9.
- 678 [61] McEwen B.S., Morrison J.H. The brain on stress: vulnerability and plasticity of the  
679 prefrontal cortex over the life course. *Neuron* 2013;79:16–29.  
680 doi:10.1016/j.neuron.2013.06.028.

- 681 [62] Bachis A., Cruz M.I., Nosheny R.L., Mocchetti I. Chronic unpredictable stress  
682 promotes neuronal apoptosis in the cerebral cortex. *Neurosci Lett* 2008;442:104–8.  
683 doi:10.1016/j.neulet.2008.06.081.
- 684 [63] Scahill R.I., Frost C., Jenkins R., Whitwell J.L., Rossor M.N., Fox NC. A longitudinal  
685 study of brain volume changes in normal aging using serial registered magnetic  
686 resonance imaging. *Arch Neurol* 2003;60:989–94. doi:10.1001/archneur.60.7.989.
- 687 [64] Kaplan J.R., Adams M.R., Clarkson T.B., Manuck S.B., Shively C.A., Williams J.K.  
688 Psychosocial factors, sex differences, and atherosclerosis: lessons from animal  
689 models. *Psychosom Med* 1996;58:598–611. doi:10.1097/00006842-199611000-  
690 00008.
- 691 [65] Nila S., Suryobroto B., Widayati K.A. Dietary variation of long tailed macaques  
692 (*Macaca fascicularis*) in Telaga Warna, Bogor, West Java. *HAYATI Journal of*  
693 *Biosciences* 2014;21:8–14. doi:10.4308/hjb.21.1.8.
- 694 [66] Brown N.M., Setchell K.D. Animal models impacted by phytoestrogens in  
695 commercial chow: implications for pathways influenced by hormones. *Lab Invest*  
696 2001;81:735–47. doi:10.1038/labinvest.3780282.
- 697 [67] Shively C.A., Mirkes S.J., Lu N.Z., Henderson J.A., Bethea C.L. Soy and social  
698 stress affect serotonin neurotransmission in primates. *Pharmacogenomics J*  
699 2003;3:114–21. doi:10.1038/sj.tpj.6500166.
- 700 [68] US Department of Agriculture ARS. Energy Intakes: Percentages of energy from  
701 protein, carbohydrate, fat, and alcohol, by gender and age, what we eat in America  
702 NHANES 2011-2012.
- 703 [69] Bédard A., Riverin M., Dodin S., Corneau L., Lemieux S. Sex differences in the  
704 impact of the Mediterranean diet on cardiovascular risk profile. *Br J Nutr*  
705 2012;108:1428–34. doi:10.1017/S0007114511006969.

- 706 [70] Simopoulos A.P. Evolutionary aspects of diet, the omega-6/omega-3 ratio and  
707 genetic variation: nutritional implications for chronic diseases. *Biomedicine &*  
708 *Pharmacotherapy* 2006;60:502–7. doi:10.1016/j.biopha.2006.07.080.
- 709 [71] Powles J., Fahimi S., Micha R., Khatibzadeh S., Shi P., Ezzati M., et al. Global,  
710 regional and national sodium intakes in 1990 and 2010: a systematic analysis of 24  
711 h urinary sodium excretion and dietary surveys worldwide. *BMJ Open*  
712 2013;3:e003733. doi:10.1136/bmjopen-2013-003733.
- 713 [72] Scheyer., O., Rahman A., Hristov H., Berkowitz C., Isaacson R.S., Diaz Brinton R.,  
714 Mosconi L. Female sex and Alzheimer’s risk: The menopause connection. *J Prev*  
715 *Alzheimer's Disease* 2018;5:225–230. doi:10.14283/jpad.2018.34.

716 **FIGURE CAPTIONS**

717 Figure 1.

718 Changes in global brain volumes during experiment. Global brain volumes changed in the  
719 Western group, while Mediterranean volumes remained stable over time. In the Western group,  
720 total brain (TBV) and gray matter (GM) volumes significantly increased, whereas the volumes of  
721 cerebrospinal fluid (CSF) and white matter (WM) significantly decreased. Percent changes in  
722 volumes from Baseline to the Experimental time points are shown for each ROI. Significant  
723 differences ( $p \leq 0.05$ ) indicated by (\*).

724

725 Figure 2.

726 Social status differences in global brain volumes. Socially subordinate monkeys had smaller A)  
727 intracranial volumes (ICV) and B) total brain volumes (TBV) than dominants. In contrast,  
728 subordinate monkeys had larger volumes than dominants in the following ROIs: C) middle  
729 temporal gyri, D) left inferior temporal gyri, and E) left meta-ROI. Adjusted means and standard  
730 errors are shown.

731

732 Figure 3.

733 Anatomical map of cortical thickness changes in AD “signature” regions. Cortical thicknesses in  
734 regions of interest for AD-like neuropathology increased in animals consuming Western, but not  
735 Mediterranean diets. Orange and yellow tones indicate increases in cortical thicknesses, and  
736 pink tones indicate decreases in cortical thicknesses. Anterior (left) to posterior (right) coronal  
737 sections are shown.

738

739 Figure 4.

740 Diet-group differences of cortical thicknesses in AD “signature” regions. Following dietary  
741 intervention, Western group cortices were significantly thicker than Mediterranean cortices for

742 every AD-signature region of interest (ROI) except the right entorhinal cortex. Individual values  
743 for the ROIs are indicated by the gray points. Adjusted means and standard errors for each diet  
744 group are indicated by the solid dots and lines, respectively.

745

746 Figure 5.

747 Diet-group differences in caudate volumes. ANCOVA controlling for baseline volumes showed  
748 that caudate volumes were smaller in the Mediterranean diet group ( $377 \pm 2.71\text{mm}^3$ ) than in the  
749 Western diet group ( $385 \pm 2.40\text{mm}^3$ ) ( $F(1,33)=4.254$ ;  $p=0.047$ ). Individual data points are  
750 indicated in gray, and adjusted means and standard errors are represented by solid dots and  
751 lines, respectively.

752

753 Figure 6.

754 Social status differences in left frontal volumes. In animals consuming Western diets, left frontal  
755 volumes were indistinguishable by social status. In contrast, within the Mediterranean diet  
756 group, subordinates had significantly larger left frontal volumes than did dominant monkeys  
757 (Tukey=0.039). Adjusted means and standard errors after adjusting for baseline volumes are  
758 shown.

759 **TABLES**

760 Table 1.

761 Irrespective of diet or social status, several UNC ROI volumes changed over the course of the  
 762 experiment. These ROIs included GM, WM, and CSF. Full models were ANCOVAs with  
 763 repeated measures ( $2_{\text{Mediterranean, Western}} \times 2_{\text{Dom, Sub}} \times 2_{\text{Left, Right}} \times 2_{\text{Base, Exp}}$ ). Means have been  
 764 adjusted for inter-individual variation in intracranial volumes, and the percent change for  
 765 individual ROIs are shown. Right and left ROIs were analyzed and reported separately if an  
 766 interaction effect of side was detected. F and p-values for the main effects of time are shown.

|               | <b>UNC ROI</b>           | <b>Adj.<br/>Base.<br/>(mm<sup>3</sup>)</b> | <b>Adj.<br/>Exp.<br/>(mm<sup>3</sup>)</b> | <b>Percent<br/>Change</b> | <b>F</b> | <b>DF1</b> | <b>DF2</b> | <b>Effect<br/>of<br/>Time <i>p</i></b> |
|---------------|--------------------------|--------------------------------------------|-------------------------------------------|---------------------------|----------|------------|------------|----------------------------------------|
| Whole<br>ROIs | Whole<br>Hippocampus     | 350.50                                     | 351.29                                    | 0.23                      | 0.239    | 1          | 112        | 0.626                                  |
|               | Anterior<br>Hippocampus  | 164.89                                     | 164.65                                    | -0.15                     | 0.034    | 1          | 112        | 0.854                                  |
|               | Posterior<br>Hippocampus | 185.66                                     | 186.66                                    | 0.54                      | 0.762    | 1          | 112        | 0.385                                  |
|               | Temporal Auditory        | 2215.63                                    | 2201.45                                   | -0.64                     | 1.236    | 1          | 112        | 0.269                                  |
|               | Temporal Visual          | 4365.39                                    | 4306.99                                   | -1.34                     | 11.541   | 1          | 112        | 0.001                                  |
|               | Prefrontal               | 2896.04                                    | 2846.02                                   | -1.73                     | 32.383   | 1          | 112        | <0.001                                 |
|               | Frontal                  | 4080.81                                    | 4035.76                                   | -1.10                     | 26.174   | 1          | 112        | <0.001                                 |
|               | Insula                   | 312.75                                     | 308.10                                    | -1.49                     | 6.700    | 1          | 112        | 0.011                                  |
|               | Amygdala                 | 280.39                                     | 280.29                                    | -0.04                     | 0.004    | 1          | 112        | 0.947                                  |
|               | Cingulate                | 808.26                                     | 814.21                                    | 0.74                      | 2.915    | 1          | 112        | 0.091                                  |



|               |                          |         |         |       |        |   |     |        |
|---------------|--------------------------|---------|---------|-------|--------|---|-----|--------|
|               | Caudate                  | 381.15  | 385.62  | 1.17  | 10.034 | 1 | 112 | 0.002  |
|               | Putamen                  | 479.07  | 484.47  | 1.13  | 6.086  | 1 | 112 | 0.015  |
|               | Parietal                 | 4061.76 | 4010.69 | -1.26 | 11.811 | 1 | 112 | 0.001  |
|               | Occipital                | 5435.93 | 5360.06 | -1.40 | 18.362 | 1 | 112 | <0.001 |
|               | Cerebellum               | 3046.96 | 3037.19 | -0.32 | 1.052  | 1 | 112 | 0.307  |
|               | Pons and Medulla         | 1117.04 | 1088.98 | -2.51 | 43.277 | 1 | 112 | <0.001 |
|               | Corpus Callosum          | 507.11  | 499.26  | -1.55 | 7.071  | 1 | 112 | 0.008  |
| L & R<br>ROIs | Right Temporal<br>Limbic | 1557.63 | 1542.74 | -0.96 | 12.857 | 1 | 37  | 0.001  |
|               | Left Temporal<br>Limbic  | 1466.00 | 1468.31 | 0.16  | 0.196  | 1 | 37  | 0.661  |

767

768 **SUPPLEMENTARY INFORMATION**

769

770 **Supplementary Note 1:** A standard monkey lab chow diet group was not included because it is  
771 unlike the diet that monkeys consume in the wild [65], there is no human diet analog, it is very  
772 low in fat (13%), and the predominant protein source is soy which is rich in isoflavones (diet  
773 5037/5038, LabDiet, St. Louis, MO; see Supplementary Table 1). Isoflavones are known  
774 selective estrogen receptor modulators, with independent effects on the brain that have been  
775 extensively described by our lab and others in rodent and in primate models (e.g., [66,67]).

776

777 **Supplementary Note 2:** While most of the monkeys did well on the diets, two animals died.  
778 They were both in the Mediterranean group and both the most socially subordinate in their  
779 groups. Both had diarrhea, the cause of which remained undiagnosed in spite of extensive  
780 testing. Compared to Baseline, monkeys in the Mediterranean group did not gain weight but  
781 those on the Western diet did [33]. Since they were thinner, they had less of a cushion to  
782 weather a bout of diarrhea. Social subordination stress may also have been a contributing  
783 factor.

784 **Supplementary Figure 1.** Schematic representation of the experimental design, including the  
785 timing of the MR scans, sample sizes, and dependent variables measured.

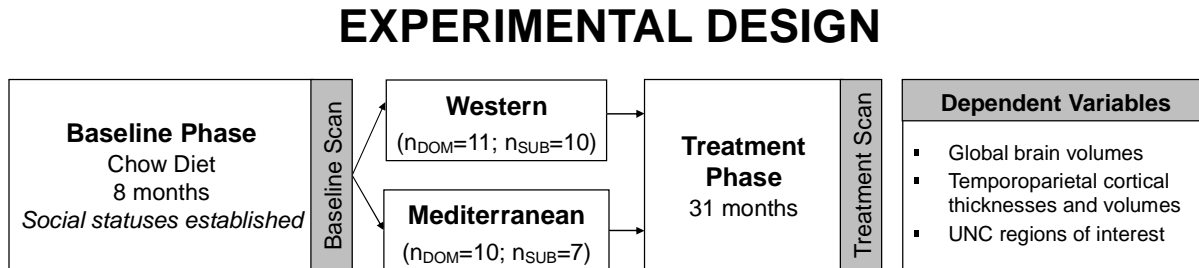

786

787 **Supplementary Table 1.** Macronutrients in the Western, Mediterranean, and monkey chow  
 788 experimental diets, compared to corresponding human diets (from [33]).

| Diet Component                   | Experimental Diets  |                    |                   | Human Diets        |                      |
|----------------------------------|---------------------|--------------------|-------------------|--------------------|----------------------|
|                                  | Western             | Mediterranean      | Chow <sup>a</sup> | Western            | Mediterranean        |
|                                  | <i>% Calories*</i>  |                    |                   |                    |                      |
| Protein                          | 16 <sup>b</sup>     | 16 <sup>3</sup>    | 18                | 15 <sup>b</sup>    | 17 <sup>3</sup>      |
| Carbohydrates                    | 54 <sup>b</sup>     | 54 <sup>3</sup>    | 69                | 51 <sup>b</sup>    | 51 <sup>3</sup>      |
| Total Fat                        | 31 <sup>b</sup>     | 31 <sup>3</sup>    | 13                | 33 <sup>b</sup>    | 32 <sup>3</sup>      |
|                                  | <i>% Total Fats</i> |                    |                   |                    |                      |
| <i>Saturated</i>                 | 36 <sup>b</sup>     | 21 <sup>c</sup>    | 26                | 33 <sup>b</sup>    | 21 <sup>c</sup>      |
| <i>Monounsaturated</i>           | 36 <sup>b</sup>     | 57 <sup>c</sup>    | 28                | 26 <sup>b</sup>    | 56 <sup>c</sup>      |
| <i>Polyunsaturated</i>           | 26 <sup>b</sup>     | 20 <sup>c</sup>    | 32                | 34 <sup>b</sup>    | 15 <sup>c</sup>      |
| n-3:n-6 fatty acids              | 14.8:1 <sup>d</sup> | 2.9:1 <sup>e</sup> | 12:1              | 15:1 <sup>d</sup>  | 2:1-3:1 <sup>e</sup> |
| Cholesterol mg/kcal <sup>f</sup> | 0.16 <sup>b</sup>   | 0.15 <sup>c</sup>  | <i>trace</i>      | 0.13 <sup>b</sup>  | 0.16 <sup>b</sup>    |
| Fiber g/kcal                     | 0.02 <sup>b</sup>   | 0.04 <sup>g</sup>  | 0.01              | 0.01 <sup>b</sup>  | 0.03 <sup>g</sup>    |
| Sodium mg/kcal                   | 1.7 <sup>b,h</sup>  | 1.0 <sup>c,g</sup> | 0.25              | 1.7 <sup>b,h</sup> | 1.3 <sup>c,g</sup>   |

789 \*values have been rounded to the nearest whole number

790 <sup>a</sup>LabDiet Monkey Diet 5037/8 (type of fat known is 86% of total fat. Omega-6 from corn and pork  
 791 fat)

792 <sup>b</sup>US Department of Agriculture [68]

793 <sup>c</sup>Bedard et al. [69]

794 <sup>d</sup>Simopoulos [70]

795 <sup>e</sup>Cordain et al. [35]

796 <sup>f</sup>About 256 mg/day or 1.3 eggs/day

797 <sup>g</sup>Kafatos et al. [7]

798 <sup>h</sup>Powles et al. [71]

799 **Supplementary Table 2.** Regions of interest (ROIs).

| AD-Signature ROIs <sup>*a</sup> | Whole Brain Volumes <sup>b</sup> | UNC ROIs <sup>b</sup> |
|---------------------------------|----------------------------------|-----------------------|
| Angular gyrus                   | Intracranial volume (ICV)        | Anterior hippocampus  |
| Inferior temporal gyrus         | Total brain volume (TBV)         | Posterior hippocampus |
| Middle temporal gyrus           | Gray matter (GM)                 | Whole hippocampus     |
| Inferior temporal gyrus         | White matter (WM)                | Temporal auditory     |
| Precuneus                       | Cerebrospinal fluid (CSF)        | Temporal visual       |
| Fusiform gyrus                  |                                  | Temporal limbic       |
| Supramarginal gyrus             |                                  | Occipital             |
| Entorhinal cortex               |                                  | Frontal               |
| Parahippocampal gyrus           |                                  | Insula                |
| Meta ROI                        |                                  | Cingulate             |
|                                 |                                  | Parietal              |
|                                 |                                  | Prefrontal            |
|                                 |                                  | Corpus Callosum       |
|                                 |                                  | Pons & Medulla        |
|                                 |                                  | Amygdala              |
|                                 |                                  | Caudate               |
|                                 |                                  | Putamen               |

800 *\*Cortical thicknesses (mm) and cortical volumes (mm<sup>3</sup>) generated for these regions of interest*

801 a. Neuromaps Scalable Atlas [42]

802 b. UNC Primate Atlas [37]

803 **Supplementary Table 3.** Diet-induced changes in cortical thickness regions of interest (ROI) for  
 804 AD-like neuropathology. Cortical thicknesses in animals consuming Western diets increased  
 805 over time, whereas the cortical thicknesses of Mediterranean animals were generally stable  
 806 over time. Full models were ANOVAs with repeated measures ( $2_{\text{Mediterranean, Western}} \times 2_{\text{Dom, Sub}} \times$   
 807  $2_{\text{Left, Right}} \times 2_{\text{Base, Exp}}$ ). P-values corresponding to diet by time interactions are shown. Post hoc *p*  
 808 values were adjusted using the Tukey method for comparing a family of 4 estimates and  
 809 indicate differences across time points within the Western diet group.

|            | Cortical Thickness ROI  | Diet | Base. (mm) | Exp. (mm) | Percent Change | F      | DF 1 | DF2 | Diet x Time <i>p</i> | Tukey post hoc <i>p</i> |
|------------|-------------------------|------|------------|-----------|----------------|--------|------|-----|----------------------|-------------------------|
| Whole ROIs | Angular Gyrus           | WEST | 2.475      | 2.816     | 13.78          | 33.349 | 1    | 107 | <0.001               | <0.001                  |
|            |                         | MED  | 2.529      | 2.540     | 0.43           |        |      |     |                      |                         |
|            | Middle Temporal Gyrus   | WEST | 2.145      | 2.359     | 9.98           | 34.938 | 1    | 107 | <0.001               | <0.001                  |
|            |                         | MED  | 2.178      | 2.183     | 0.23           |        |      |     |                      |                         |
|            | Fusiform                | WEST | 2.320      | 2.480     | 6.90           | 10.233 | 1    | 107 | 0.002                | <0.001                  |
|            |                         | MED  | 2.446      | 2.436     | -0.41          |        |      |     |                      |                         |
|            | Parahippocampus         | WEST | 2.259      | 2.450     | 8.46           | 10.090 | 1    | 107 | 0.002                | <0.001                  |
|            |                         | MED  | 2.382      | 2.389     | 0.29           |        |      |     |                      |                         |
|            | Supramarginal Gyrus     | WEST | 2.637      | 2.941     | 11.53          | 37.966 | 1    | 107 | <0.001               | <0.001                  |
|            |                         | MED  | 2.665      | 2.631     | -1.28          |        |      |     |                      |                         |
|            | Inferior Temporal Gyrus | WEST | 2.301      | 2.450     | 6.48           | 19.070 | 1    | 107 | <0.001               | <0.001                  |
|            |                         | MED  | 2.327      | 2.315     | -0.52          |        |      |     |                      |                         |

|            |                         |      |       |       |       |        |   |     |        |        |
|------------|-------------------------|------|-------|-------|-------|--------|---|-----|--------|--------|
|            | Superior Temporal Gyrus | WEST | 2.704 | 3.045 | 12.61 | 42.035 | 1 | 107 | <0.001 | <0.001 |
|            |                         | MED  | 2.633 | 2.739 | 4.03  |        |   |     |        |        |
|            | Precuneus               | WEST | 2.305 | 2.523 | 9.46  | 23.064 | 1 | 107 | <0.001 | <0.001 |
|            |                         | MED  | 2.351 | 2.355 | 0.17  |        |   |     |        |        |
|            | Meta ROI                | WEST | 2.462 | 2.716 | 10.32 | 38.864 | 1 | 107 | <0.001 | <0.001 |
|            |                         | MED  | 2.511 | 2.502 | -0.36 |        |   |     |        |        |
| R & L ROIs | Right Entorhinal Cortex | WEST | 3.144 | 3.226 | 2.61  | 0.012  | 1 | 35  | 0.914  | 0.297  |
|            |                         | MED  | 3.126 | 3.204 | 2.50  |        |   |     |        |        |
|            | Left Entorhinal Cortex  | WEST | 3.244 | 3.399 | 4.78  | 6.460  | 1 | 35  | 0.016  | 0.006  |
|            |                         | MED  | 3.252 | 3.241 | -0.34 |        |   |     |        |        |

810

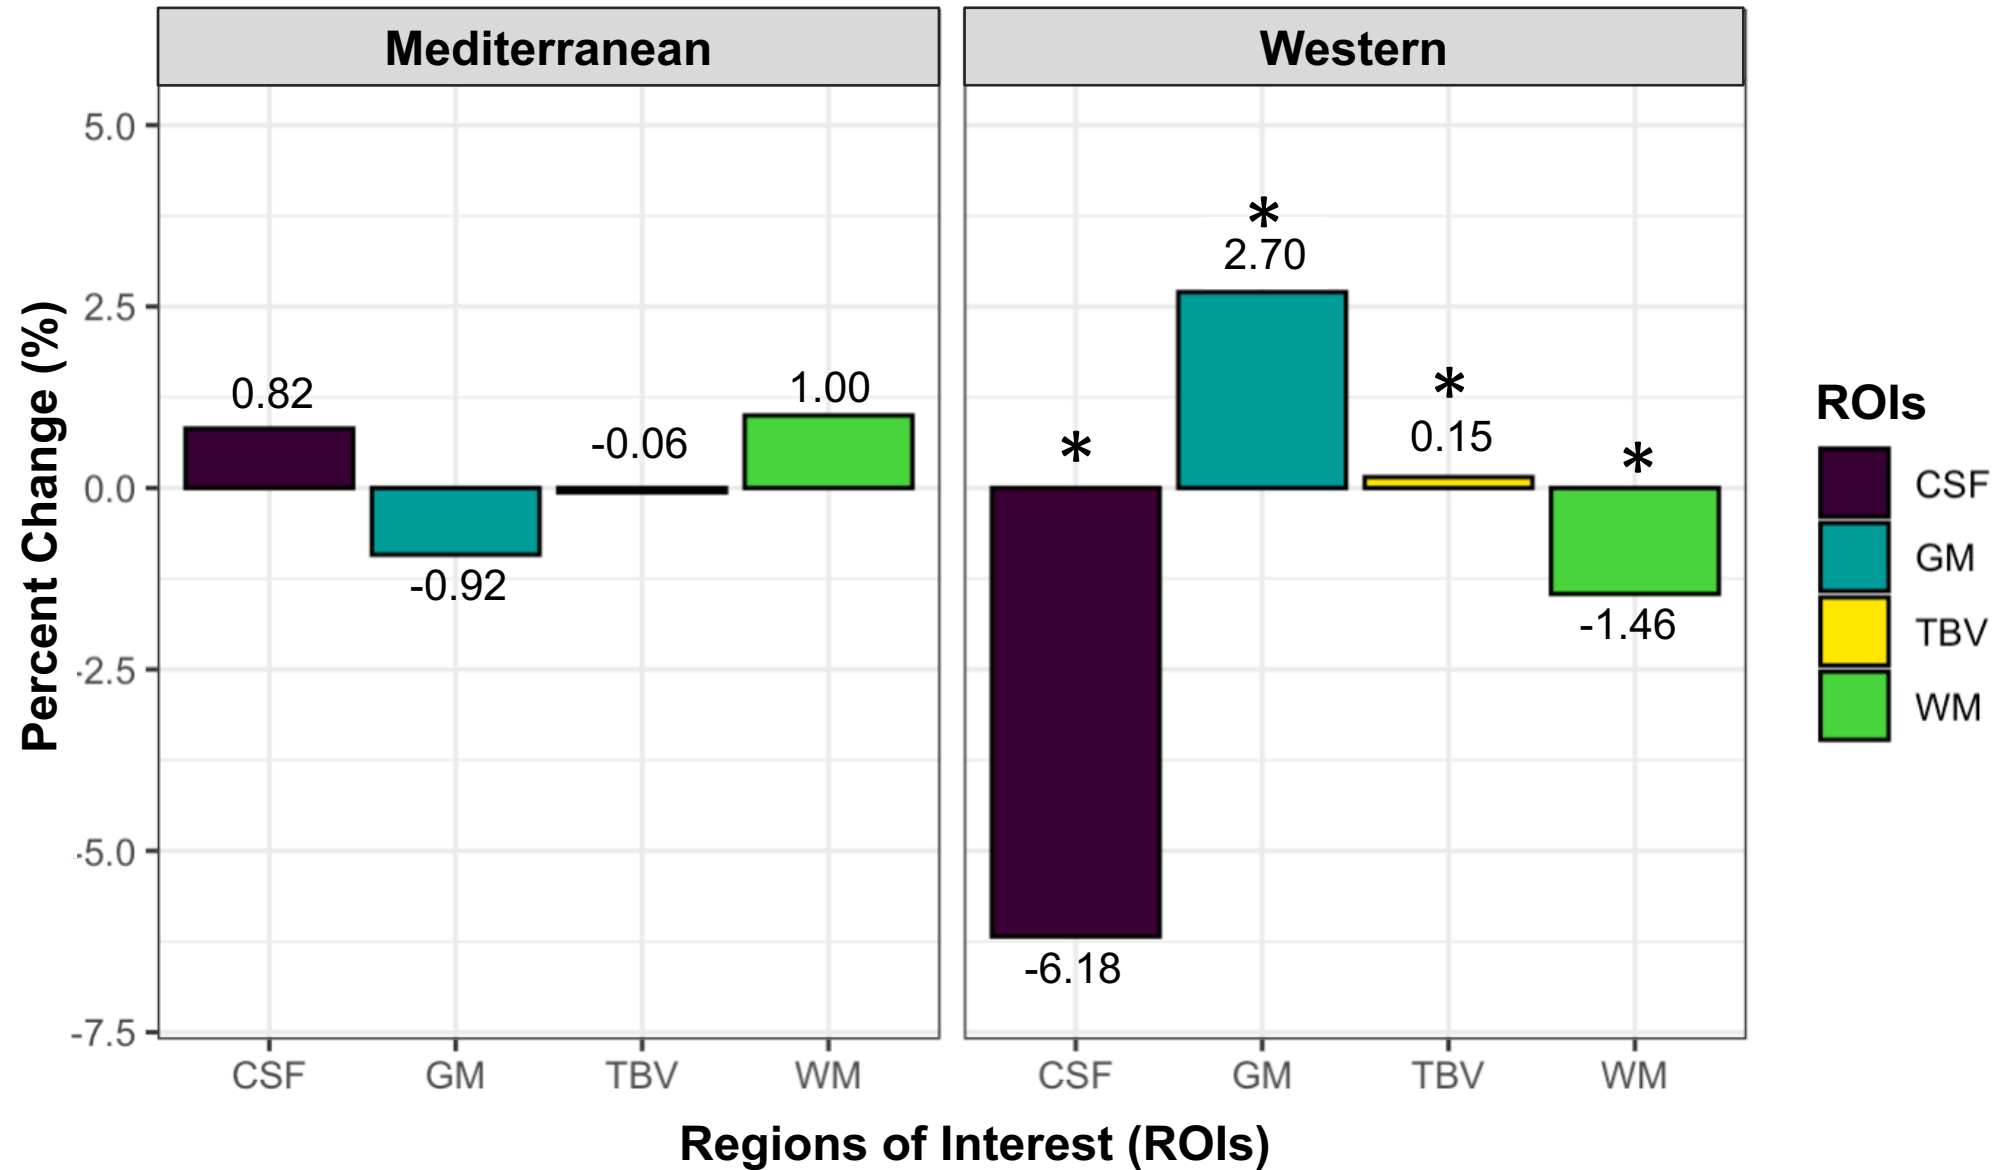



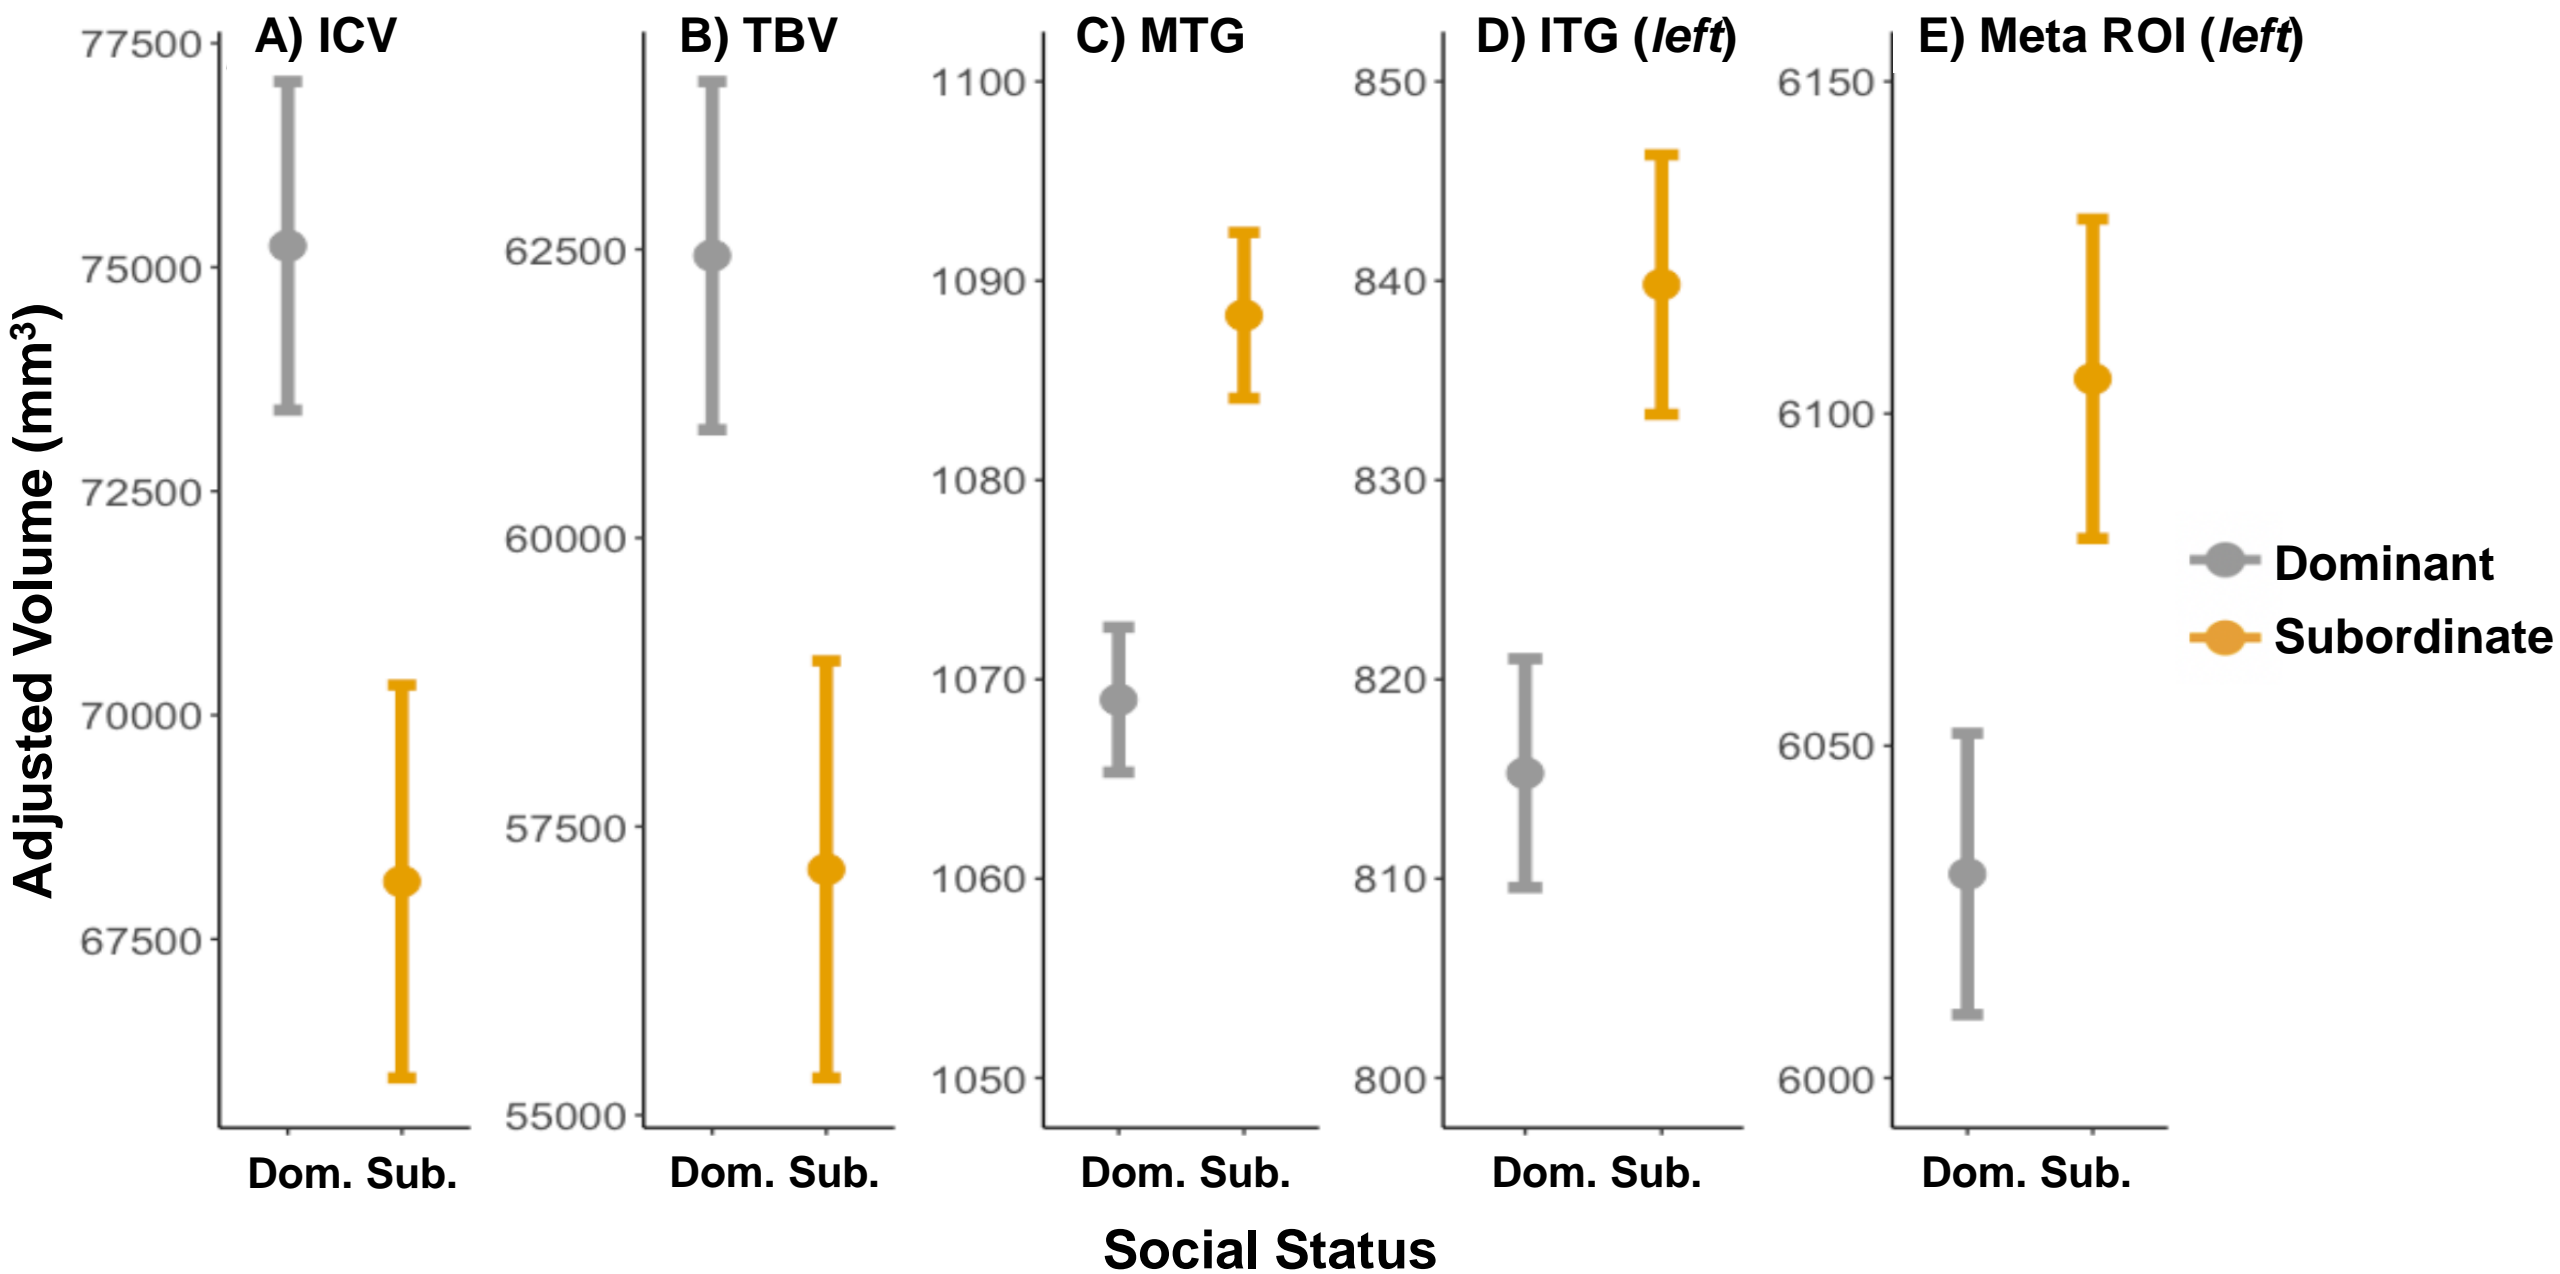

## Mediterranean Diet

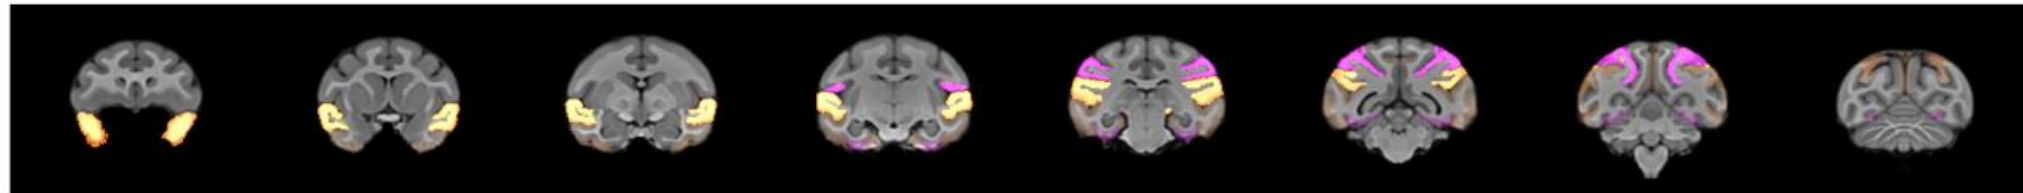

% Change

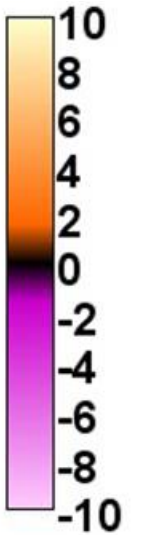

## Western Diet

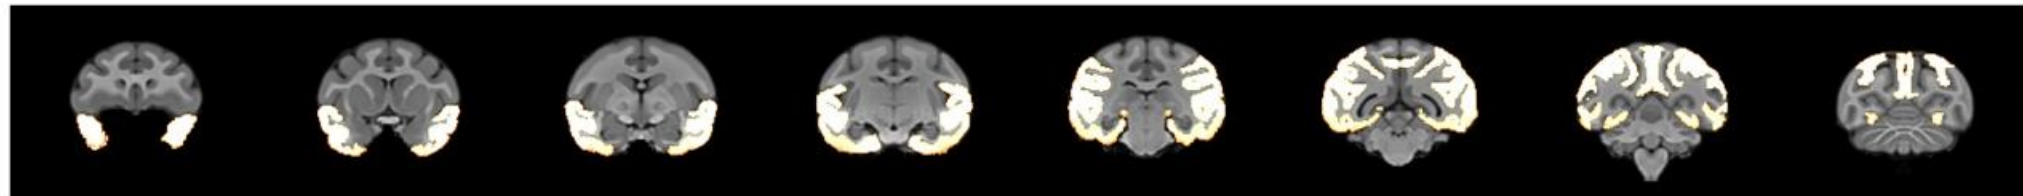

*Anterior*

*Posterior*

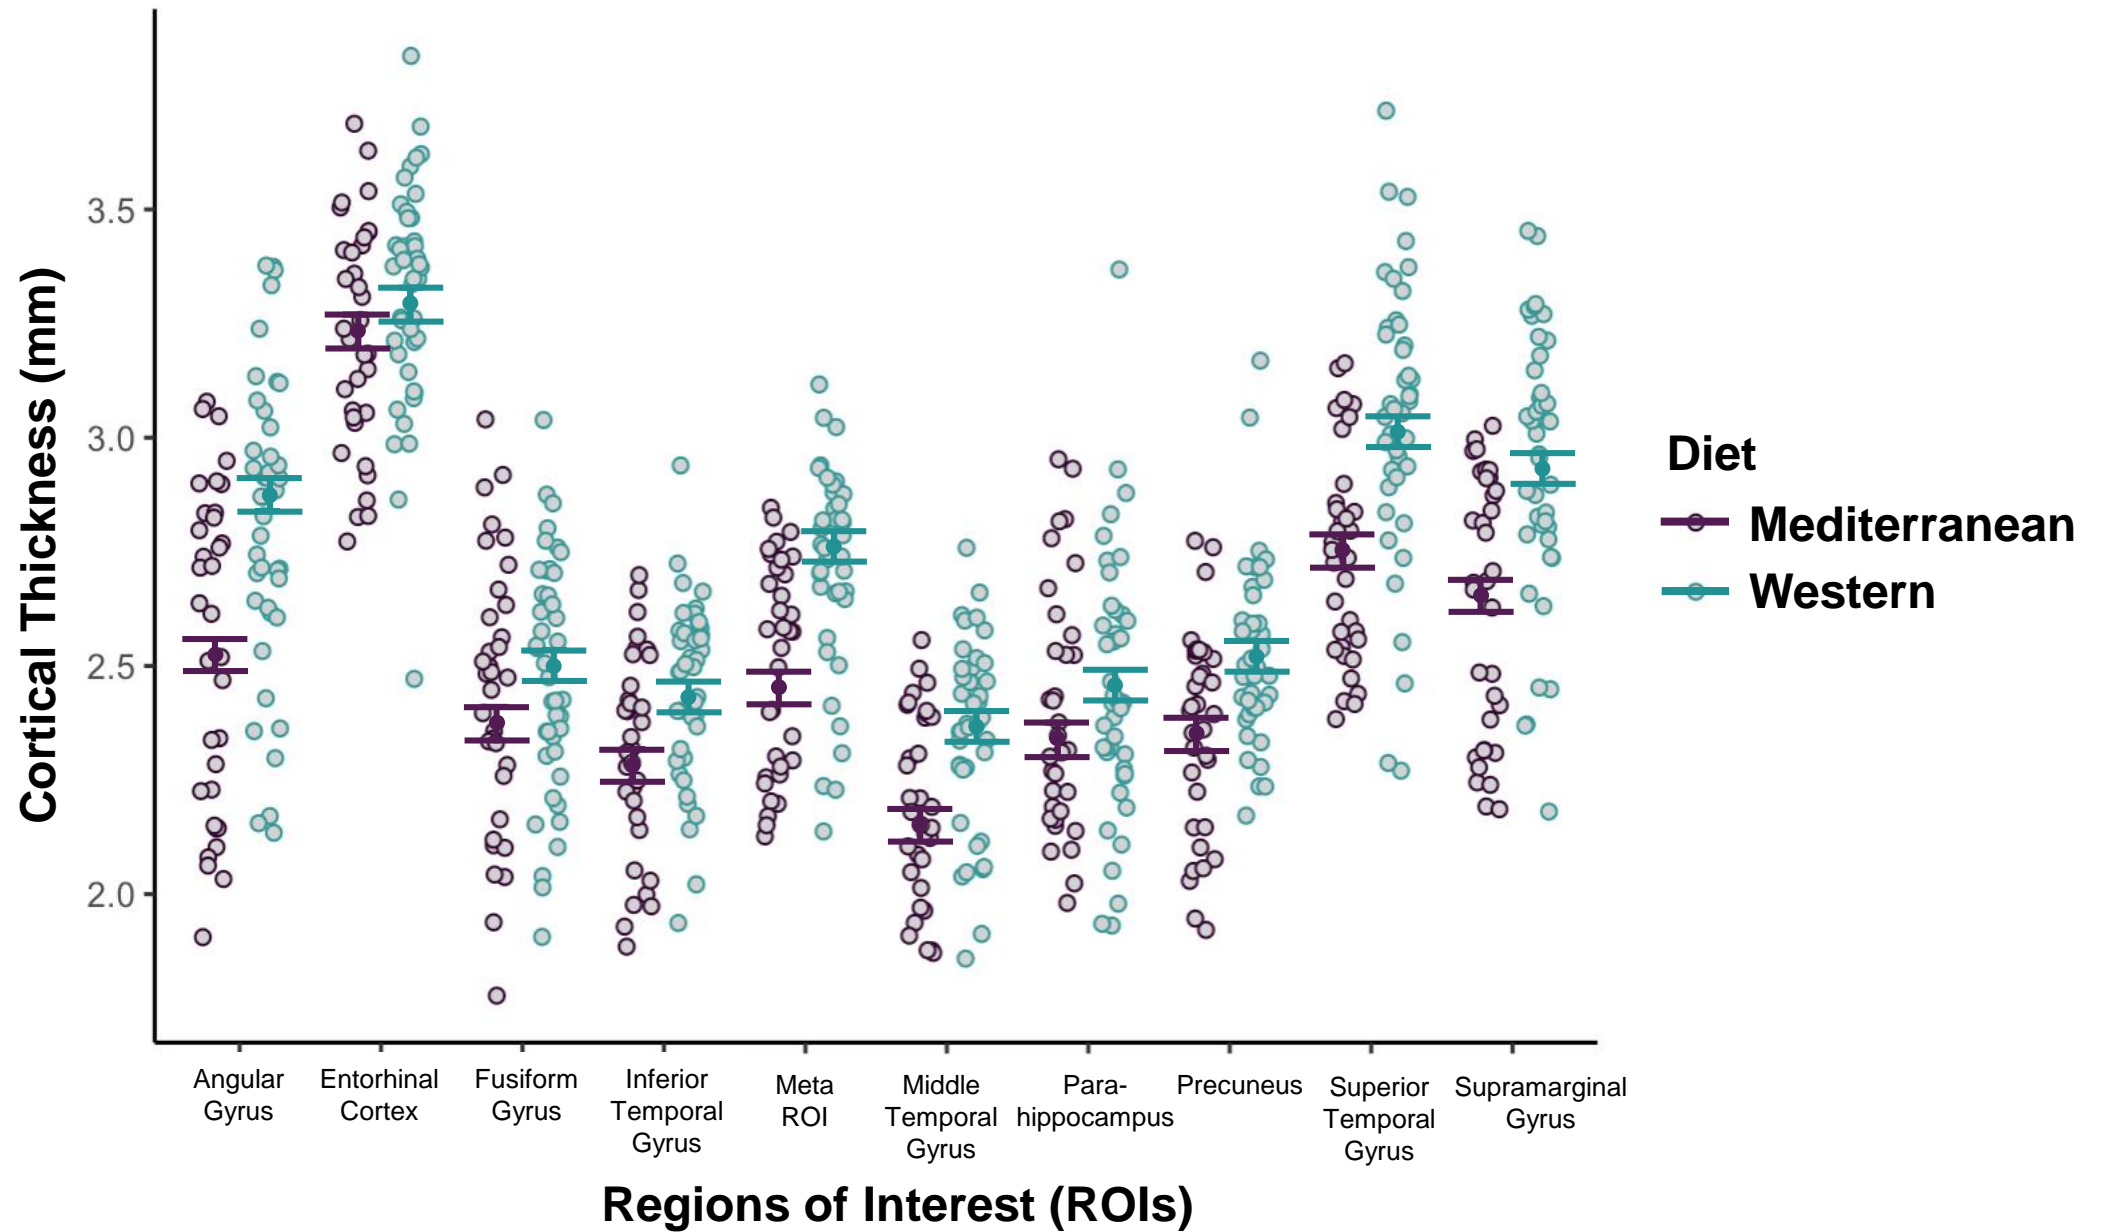

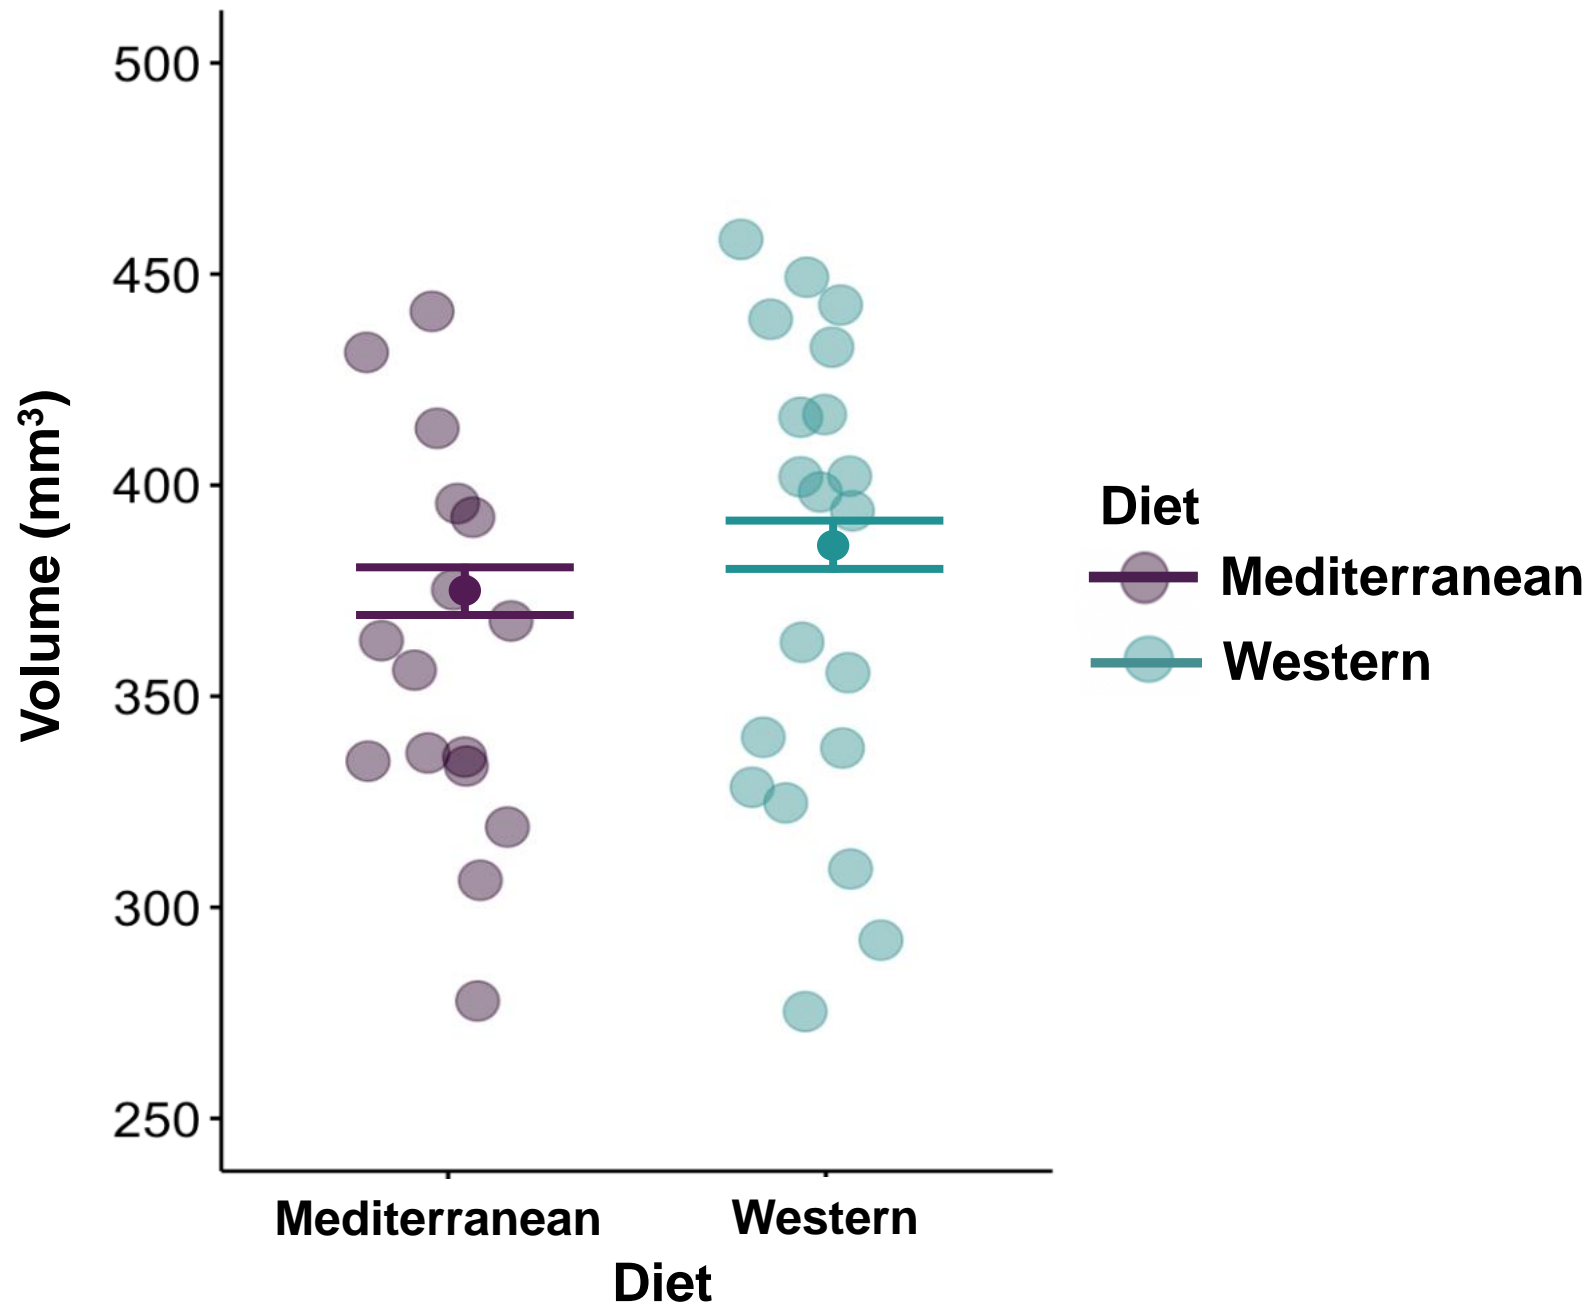

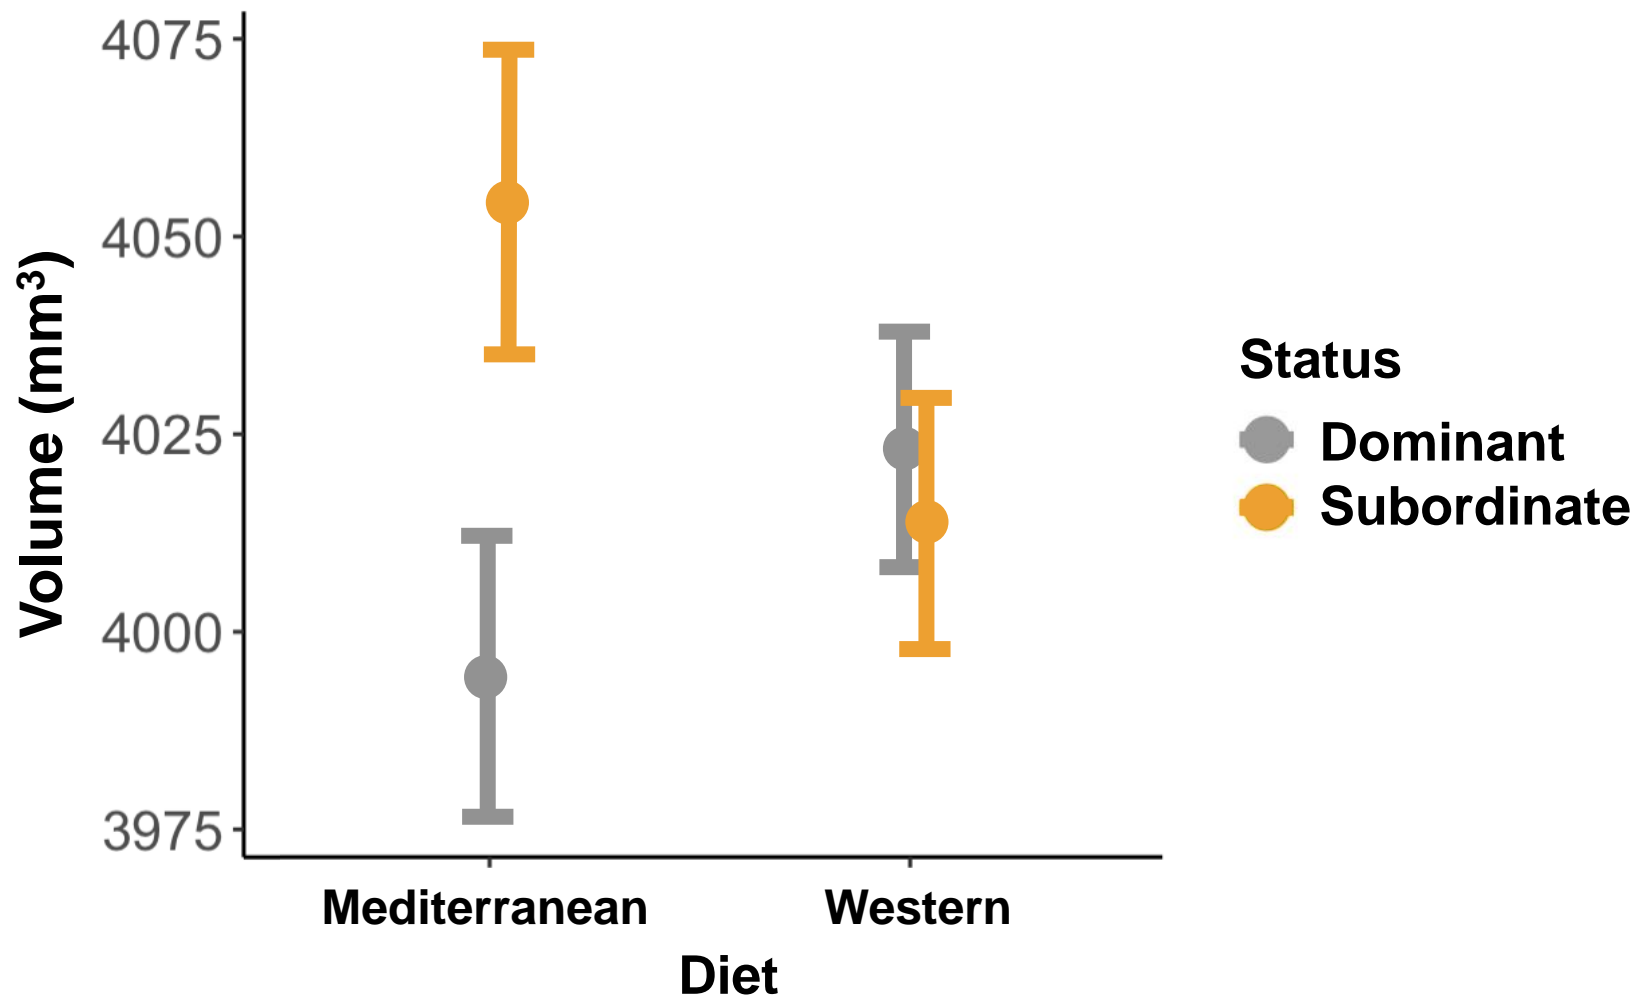

# EXPERIMENTAL DESIGN

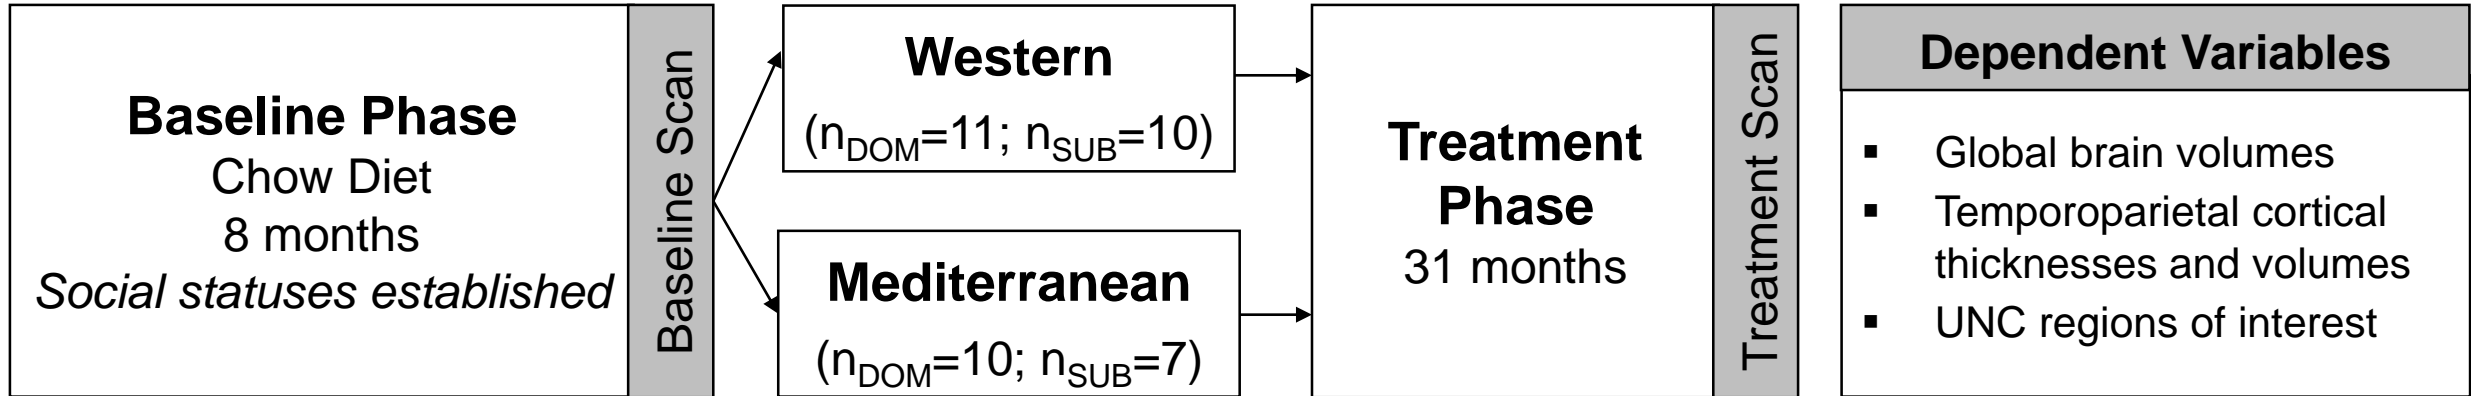

Source: https://www.biorxiv.org/content/10.1101/2020.09.25.313593v1.full.pdf
